1  
2  
3  
4  
5  
6  
7  
8  
9  
10  
11  
12  
13  
14  
15  
16  
17  
18  
19

# Chromatin and transcriptomic profiling uncover dysregulation of the Tip60 HAT/HDAC2 epigenomic landscape in the neurodegenerative brain

Mariah Beaver<sup>+</sup>, Bhanu Chandra Karisetty<sup>+</sup>, Haolin Zhang<sup>¶</sup>, Akanksha Bhatnagar<sup>¶</sup>, Ellen  
Armour, Visha Parmar, Reshma Brown, Merry Xiang and Felice Elefant<sup>\*</sup>

<sup>+</sup>Authors contributed equally to this work as first authors.

<sup>¶</sup>Authors contributed equally to this work as second authors

Department of Biology, Drexel University, Philadelphia, PA 19104, USA

<sup>\*</sup>Corresponding Author: Felice Elefant, Ph.D.

3245 Chestnut Street, PISB 312,

Department of Biology,

Drexel University,

Philadelphia, PA 19104, USA.

Email: [fe22@drexel.edu](mailto:fe22@drexel.edu)

FAX: 215-895-1273

## 20 **ABSTRACT**

21 Disruption of histone acetylation mediated gene control is a critical step in Alzheimer's Disease  
22 (AD), yet chromatin analysis of antagonistic histone acetyltransferases (HATs) and histone  
23 deacetylases (HDACs) causing these alterations remains uncharacterized. We report the first  
24 Tip60 HAT versus HDAC2 chromatin and transcriptional profiling study in *Drosophila* brains  
25 that model early human AD. We find Tip60 and HDAC2 predominantly recruited to identical  
26 neuronal genes. Moreover, AD brains exhibit robust genome-wide early alterations that include  
27 enhanced HDAC2 and reduced Tip60 binding and transcriptional dysregulation. Orthologous  
28 human genes to co-Tip60/HDAC2 *Drosophila* neural targets exhibit conserved disruption  
29 patterns in AD patient hippocampi. Notably, we discovered distinct transcription factor (TF)  
30 binding sites within Tip60/HDAC2 co-peaks in neuronal genes, implicating them in co-enzyme  
31 recruitment. Increased Tip60 protects against transcriptional dysregulation and enhanced  
32 HDAC2 enrichment genome-wide. We advocate Tip60 HAT/HDAC2 mediated epigenetic  
33 neuronal gene disruption as a genome-wide initial causal event in AD.

## 34 **INTRODUCTION**

35 Alzheimer's Disease (AD) is a chronic neurodegenerative disorder affecting the elderly  
36 and is the most common cause of dementia. The disease is hallmarked by amyloid- $\beta$  (A $\beta$ ) plaque  
37 accumulation, Tau mediated neurofibrillary tangles, and neuronal cell death in the brain that is  
38 accompanied by debilitating cognitive deficits in AD patients that worsen as they age. The  
39 severity and speed of AD progression are dependent upon complex interactions between  
40 genetics, age, and environmental factors (Karch, Cruchaga, & Goate, 2014; Masters et al., 2015;  
41 Sanchez-Mut & Graff, 2015), all of which are orchestrated, at least in part, by epigenetic histone  
42 acetylation mediated gene control mechanisms. Indeed, decreased chromatin histone acetylation  
43 levels have been reported in the brains of animal models and human patients that have multiple  
44 types of neurodegenerative diseases that include AD (Berson, Nativio, Berger, & Bonini, 2018;  
45 Saha & Pahan, 2006). These alterations have been shown to cause an epigenetic blockade of  
46 neuroplasticity gene transcription that contributes to cognitive impairment (Graff et al., 2012;  
47 Panikker et al., 2018). More recently, a compelling study using the brains of AD patients  
48 reported an age-associated genome-wide reduction of the histone acetylation H4K16  
49 modification that is proposed to contribute to epigenetic gene alteration mediated

50 neurodegeneration (Nativio, Donahue, Berson, Lan, Amlie-Wolf, Tuzer, Toledo, Gosai, Gregory,  
51 & Torres, 2018). Despite these informative findings, to date, all AD-associated genome-wide  
52 epigenetic studies are limited to examining chromatin histone acetylation patterns and alterations  
53 already generated. Thus, little is known about the genome-wide distribution of the antagonizing  
54 histone acetyltransferase (HAT) and histone deacetylase (HDAC) enzymes that act to modify the  
55 neural epigenome by generating and erasing specific cognition-linked acetylation marks,  
56 respectively, and thus serve as the causative agents of memory-impairing histone acetylation  
57 alterations in AD.

58         Appropriate histone acetylation homeostasis in the brain is maintained by HATs and  
59 HDACs that in general, activate and repress neural gene expression profiles, respectively.  
60 Disruption of this finely tuned HAT and HDAC epigenetic balance causes transcriptional  
61 dysregulation that is a key step in AD etiology (Graff et al., 2012; X. Lu, Wang, L., Yu, C.,  
62 Yu, D., and Yu, G., 2015; Saha & Pahan, 2006; Sanchez-Mut & Graff, 2015). In support of this  
63 concept, we and others have reported reduced HAT Tip60 (KAT5) (Panikker et al., 2018) and  
64 enhanced HDAC2 (Graff et al., 2012) recruitment to a set of critical neuroplasticity genes in AD  
65 animal models and human patients that causes reduced histone acetylation at these gene loci with  
66 concomitant transcriptional repression. Nevertheless, whether similar alterations of Tip60 and  
67 HDAC2 chromatin distribution with concomitant transcriptional dysregulation are a genome-  
68 wide phenomenon that occurs as an early initial event in AD progression remains unknown.

69         Here we report the first genome-wide study profiling Tip60 HAT versus HDAC2  
70 chromatin distribution and transcriptional dynamics in the brains of amyloid precursor protein  
71 (APP) *Drosophila* larvae that effectively model early human AD neurodegeneration both  
72 epigenetically and pathologically. We find that Tip60 and HDAC2 predominantly recruited on  
73 identical neuronal genes with enrichment peaking across entire gene bodies. Astoundingly, prior  
74 to amyloid- $\beta$  accumulation, AD larval brains exhibit robust genome-wide binding disruptions:  
75 enhanced HDAC2 and reduced Tip60 binding with concomitant transcriptional dysregulation.  
76 Orthologous human genes to co-Tip60/HDAC2 AD-associated neural targets identified in  
77 *Drosophila* exhibit conserved disruption patterns in the human AD hippocampus. Notably, we  
78 discovered eight transcription factors (TFs) binding close or within Tip60/HDAC2 co-peaks in  
79 neuronal genes, implicating them in co-enzyme recruitment to these loci. Strikingly, increased

80 Tip60 protects against transcriptional dysregulation and enhanced HDAC2 enrichment genome-  
81 wide. Based on these results, we advocate that Tip60 HAT/HDAC2 mediated epigenetic  
82 transcriptional dysregulation is a genome-wide initial causal event in the AD brain that can be  
83 reversed by restoring Tip60/HDAC2 balance.

## 84 RESULTS

### 85 **Tip60 protects against early and late transcriptome-wide alterations in the AD-associated** 86 **neurodegenerative brain.**

87 Mild cognitive impairment (MCI) is a debilitating hallmark during early pre-clinical stages  
88 of AD, yet the molecular events that trigger these impairments are unclear. We and others have  
89 shown that such preclinical AD pathologies in humans are conserved in the well-characterized  
90 AD-associated human amyloid precursor protein (APP) *Drosophila* model that inducibly and  
91 pan-neuronally express human APP (Fossgreen, Brückner, et al., 1998; Panikker et al., 2018).  
92 Third-instar larvae that model early staged APP-induced neurodegeneration show deficits in  
93 cognitive ability and synaptic plasticity, axonal transport and outgrowth, and apoptotic neuronal  
94 cell death in the brain (Johnson, Sarthi, Pirooznia, Reube, & Elefant, 2013; Panikker et al., 2018;  
95 Pirooznia et al., 2012). APP flies also display A $\beta$  plaque accumulation in the aged adult fly eye  
96 *via* human conserved endogenous gamma (Fossgreen, Bruckner, et al., 1998) and beta-secretase  
97 cleavage pathways (Greeve, 2004). Thus, we first asked whether APP flies also display A $\beta$   
98 plaque formation in the fly brain and whether its accumulation is associated with the early pre-  
99 clinical AD defects modeled during larval stages. We focused our studies on the mushroom body  
100 (MB) Kenyon cell region as we have shown that Tip60, robustly produced in the MB, is required  
101 for MB role in learning and memory and that MB morphology is disrupted in the aged seven-  
102 day-old APP fly brain (Xu et al., 2014). Anti-A $\beta$  immunofluorescence studies (Iijima et al.,  
103 2008; Iijima et al., 2004) revealed that APP expression in the *Drosophila* brain results in diffuse  
104 amyloid deposits that appear in the MB of seven-day-old flies (Fig. 1Aii and 1Bii). These A $\beta$   
105 plaque deposits are unobservable in an earlier AD stage modeled in third-instar larvae (Fig. 1Ai  
106 and 1Bi). These results suggest that molecular mechanisms distinct from A $\beta$  plaques trigger early  
107 AD pre-clinical impairments.

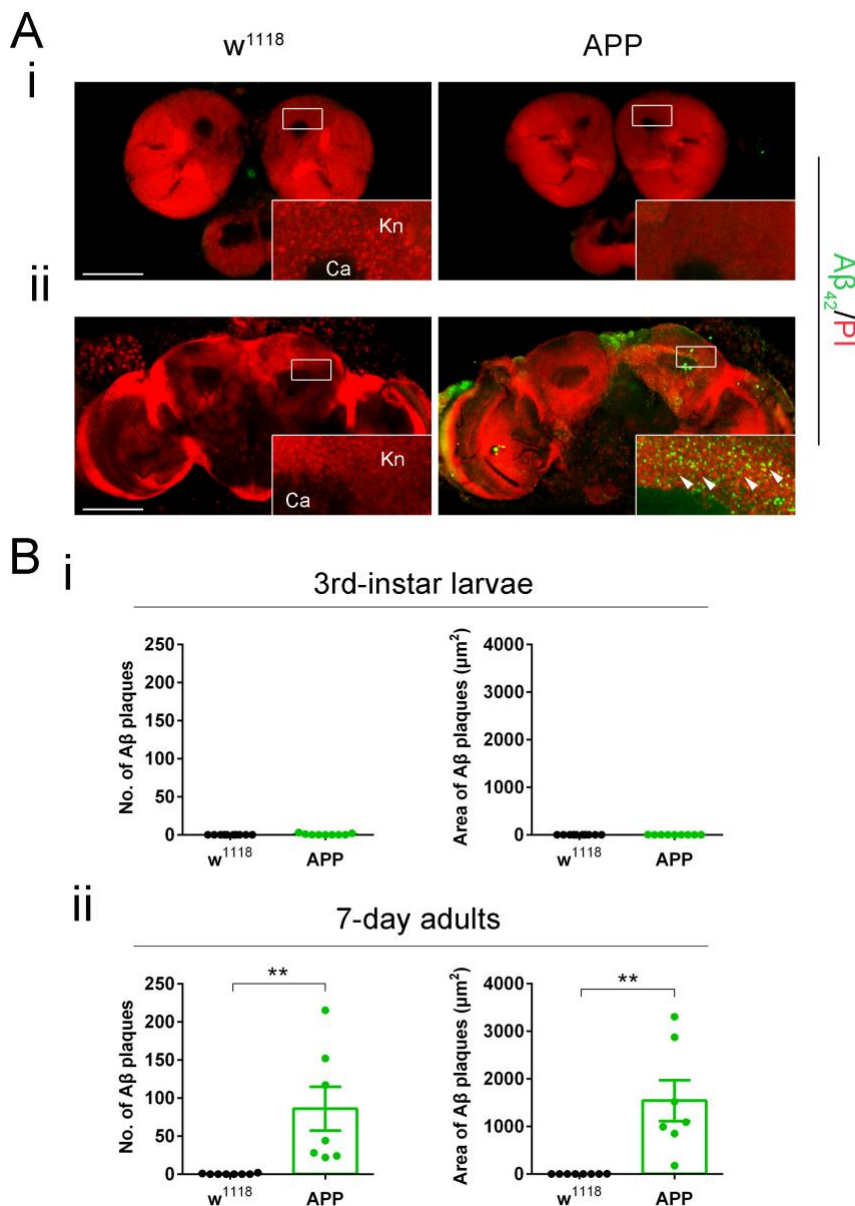

108

109 **Figure 1. Diffuse amyloid deposits are abundant in the mushroom body (MB) in 7-day APP**  
110 **adults but not in 3rd-instar APP larvae.** (A) Representative images. A $\beta$  plaques were stained  
111 with anti-A $\beta$ 42 antibody (green). Nuclei were stained with PI (red). The Kenyon (Kn) cell region  
112 (boxed) was zoomed in to display Kn cells and A $\beta$  plaques. (i) Immunostaining of brains of 3rd-  
113 instar larvae shows a negligible A $\beta$ 42 signal in APP flies compared to no A $\beta$ 42 signal in w1118  
114 flies. (ii) Immunostaining of brains of 7-day adults shows evident A $\beta$  plaques in APP flies  
115 compared to w1118 flies. Arrowheads indicate A $\beta$  plaques. No A $\beta$ 42 signal was detected in the  
116 Calyx (Ca) region. Scale bar represents 100  $\mu\text{m}$ . (B) A $\beta$  plaque was quantified by both number  
117 and size. (i) Quantification of A $\beta$  plaque numbers and areas in the 3rd-instar larval brain Kn  
118 region.  $n = 9 \sim 10$ . (ii) Quantification of A $\beta$  plaque numbers and area in the 7-day adult brain Kn  
119 region.  $n = 8 \sim 9$ . \*\* $p < 0.01$ ; unpaired student's t-test. All data are shown as mean  $\pm$  s.e.m.

120 Gene expression (Grothe et al., 2018; Patel, Dobson, & Newhouse, 2019) and genetic  
121 variation (Karch et al., 2014; Kunkle et al., 2019) studies in AD patients and animal models  
122 indicate that alteration in gene control contributes to disease pathology. Nevertheless, whether  
123 genome-wide gene expression alterations trigger MCI before A $\beta$  plaque formation remains to be  
124 further elucidated as gene studies predominantly rely on aged AD brain samples. To address this  
125 question, we profiled genome-wide transcriptional changes during early neurodegeneration  
126 stages modeled in APP larval brains and later stages modeled in the aged seven-day-old APP fly  
127 heads. As we previously identified disruption of Tip60/HDAC2 mediated neuronal gene control  
128 as a potential early mechanism underlying neuronal deficits in APP flies (Panikker et al., 2018),  
129 we also asked whether increasing Tip60 HAT activity would protect against potential genome-  
130 wide early and late-stage gene alterations.

131 For transcriptome analysis, RNA was isolated from the brains of staged third-instar larvae  
132 and from the heads of seven-day-old flies that were w<sup>1118</sup> control flies or flies expressing either  
133 APP or APP;Tip60 under the control of the pan-neuronal elav-GAL4 driver. We used RNA-Seq  
134 to quantify gene expression changes. PCA analysis (Supplemental Fig. 1A & 1B) and  
135 hierarchically clustered heatmaps (Supplemental Fig. 1C & 1D) show homogeneity within  
136 replicates and variability between groups. Importantly, in both early and late developmental  
137 stages, the APP;Tip60 transcriptome displays more similarity to the w<sup>1118</sup> transcriptome than the  
138 APP transcriptome (Supplemental Fig. 1C & 1D). Further, tissue enrichment with the human  
139 orthologs of the top 2000 APP-induced gene alterations underscores the neural specificity in  
140 gene expression defects (Supplemental Fig. 1E & 1F). Reflecting the plaque formation in adult  
141 brains, significant alterations in gene expression were identified in the adult APP fly heads (APP  
142 vs w<sup>1118</sup>: 1493 up/1641 down). Surprisingly, in the absence of plaque formation in the early APP  
143 larval stage brain, we observed even greater changes in gene expression (APP vs w<sup>1118</sup>: 1750  
144 up/2261 down) when compared with adult APP fly heads (Fig. 2A and Supplemental Table 1:  
145 S1-1 & S1-3). Consistent with our prior findings demonstrating Tip60 protection against AD  
146 defects modeled in APP flies, Tip60 expression led to notable gene expression alterations in both  
147 APP larval (APP;Tip60 vs. APP: 311 up/338 down) and adult heads (APP;Tip60 vs. APP: 1023  
148 up/1280 down) (Fig. 2A and Supplemental Table 1: S1-2 & S1-4). We next analyzed the data  
149 with the goal of identifying Tip60 rescued genes and associated biological processes specifically  
150 reprogrammed by Tip60. To this end, we analyzed the distribution and intersection between

151 down and up-regulated genes between APP vs.  $w^{1118}$  and APP;Tip60 vs. APP in larval (Fig. 2B)  
152 and adult (Fig. 2C) stages. In the APP larval brain, approximately 11% (458/4011) of gene  
153 changes (APP vs  $w^{1118}$ ) are specifically protected against by increased Tip60 and are referred to  
154 here as "Tip60 reprogrammed genes". In APP adult heads, approximately 60% (1898/3134) of  
155 APP-induced genes (APP vs  $w^{1118}$ ) were identified as Tip60 reprogrammed genes. Thus, the  
156 number of Tip60 rescued genes is significantly greater in the adult stage than in the larval stage.  
157 GO analysis revealed that among the top 25 biological processes associated with the Tip60  
158 reprogrammed genes identified in adult flies, axon and dendrite related pathways were enriched  
159 (Fig. 3D and Supplemental Table 2: S2-3), while cell-cycle regulation processes and RNA  
160 metabolic processes were enriched in the larval stage (Fig. 3A and Supplemental Table 2: S2-2).  
161 Lipid metabolic pathways were enriched for Tip60 rescued genes in both adult and larval stages  
162 (Fig. 3B & 3C and Supplemental Table 2: S2-4 & S2-1). Our transcriptomic analysis reveals that  
163 Tip60 protects against genome-wide gene expression alterations important for neuronal function  
164 during early and late-stage AD-associated neurodegeneration with enhanced protection during  
165 later stages.

166

167

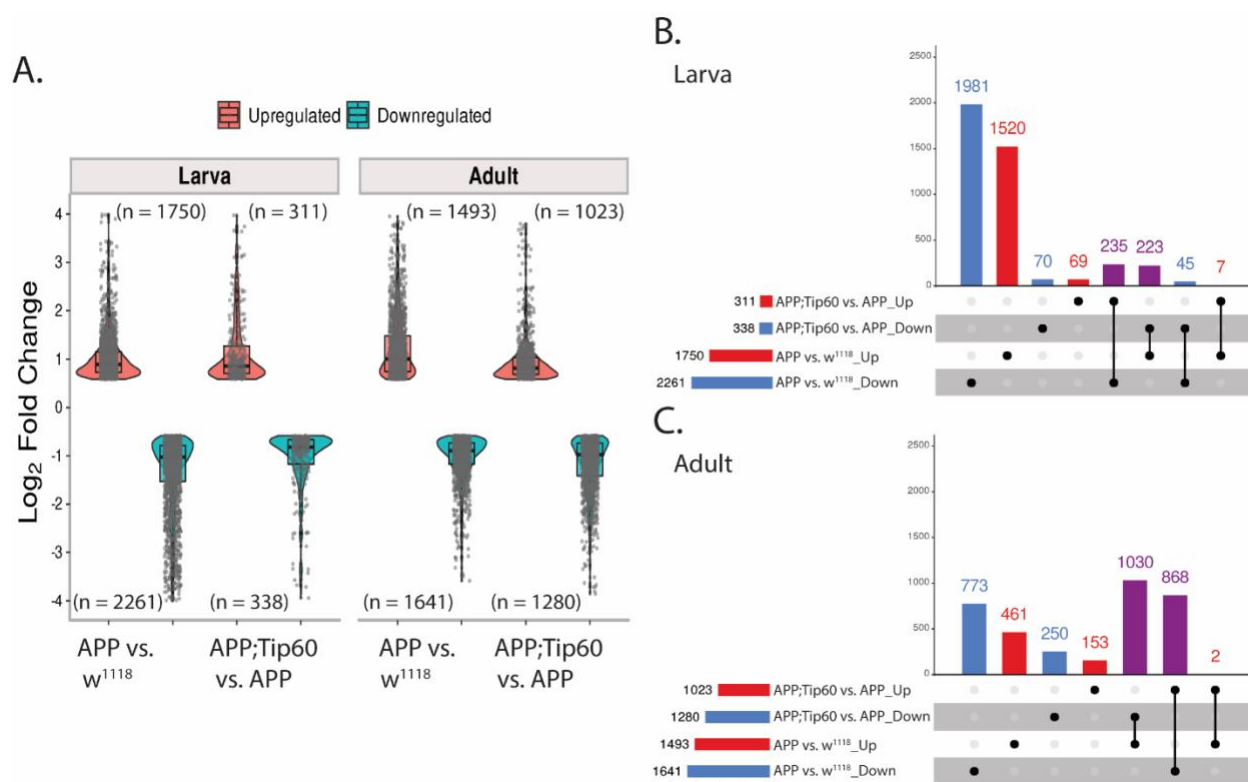

168

169 **Figure 2: Tip60 protects against early (third instar larval) and late (seven-day-old adult)**  
 170 **transcriptomic deregulation in the APP AD associated neurodegenerative brain.** (A) Log<sub>2</sub>  
 171 fold changes of differentially expressed genes ( $p_{adj} \leq 0.05$  and  $\log_2\text{FoldChange}$  of  $\leq -0.583$  and  
 172  $\geq 0.583$ ) determined by RNA-seq in the third instar larval and adult heads in APP vs. *w1118* and  
 173 APP;Tip60 vs. APP. Changes were prominent in both third instar larval and adult APP heads,  
 174 while Tip60-induced changes initiated in the third instar larval head and were prominent in the  
 175 adult head: indicating the effect of Tip60 over time. (B & C) The upSet plot represents the  
 176 distribution and intersection of down and up-regulated genes between APP vs. *w1118* and  
 177 APP;Tip60 vs. APP in third instar larval (B) and adult (C) heads. Rows represent the number of  
 178 genes in each comparison (APP vs. *w1118* and APP;Tip60 vs. APP), and columns represent the  
 179 number of genes per interaction. The red and blue bars represent the up and down-regulated  
 180 genes, respectively. The black filled dots indicate the association between rows. The red and blue  
 181 columns represent genes uniquely up-regulated and down-regulated genes, respectively, in given  
 182 comparisons, while the purple columns represent Tip60 reprogrammed genes.



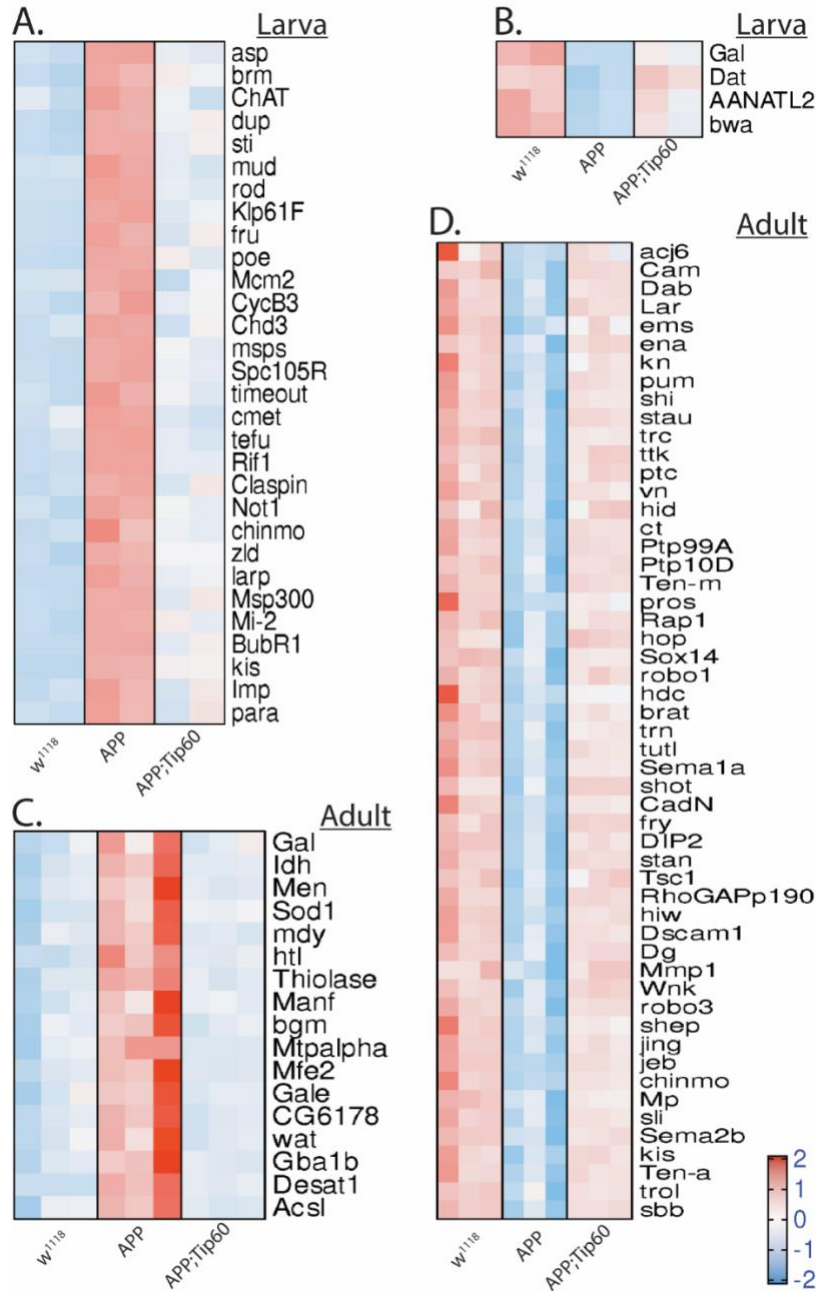

183

184 **Figure 3: Heatmaps depicting the relative expression pattern of genes misregulated in APP**  
 185 **larval and adult heads and are rescued by Tip60.** Representation of genes from the most  
 186 representative biological processes in the top 25 pathways enriched from the rescue gene list. (A)  
 187 Heatmap of genes representing the cell-cycle regulation processes and RNA metabolic processes  
 188 in the third instar larval head. Heatmap of genes representing the lipid metabolic pathways in the  
 189 (B) third instar larval head and (C) the adult head. (D) Heatmap of genes representing the axon  
 190 and dendrite related pathways in the adult head. Log-transformed gene expression values are  
 191 displayed as colors ranging from red to blue, as shown in the key. Red represents an increase in  
 192 gene expression, while blue represents a decrease in expression.

193 **Increased Tip60 protects against enhanced repressor HDAC2 recruitment along the**  
194 **neuronal gene bodies during early AD neurodegeneration.**

195 To elucidate the role of Tip60 and HDAC2 in the early transcriptional dysregulation we  
196 observed in the larval brain prior to A $\beta$  plaque formation, we profiled genome-wide enrichment  
197 of Tip60 and HDAC2 by ChIP-Seq in larval heads obtained from  $w^{1118}$ , APP, or APP;Tip60  
198 genotypes (Supplemental Table 3). The peaks identified by ChIP-seq (Supplemental Fig. 2A &  
199 2D) were first annotated to gain insight into their distribution over the genome (Supplemental  
200 Fig. 2B & 2E). Interestingly, approximately 60% of the peaks identified for both HDAC2 and  
201 Tip60 enrichment were along the gene body (exon and intron regions). A comparative analysis  
202 of the genes associated with these peaks among the genotypes (APP, APP;Tip60,  $w^{1118}$ ) revealed  
203 ~79% commonality for HDAC2 and ~88% commonality for Tip60 (Supplemental Fig. 2C &  
204 2F). Further, PCA analysis (Supplemental Fig. 3A & 3B) and hierarchically clustered heatmaps  
205 (Supplemental Fig. 3C & 3D) shown homogeneity within replicates and variability between  
206 groups in both HDAC2 and Tip60. These results suggest that similar genes were regulated in  
207 each genotype by Tip60 or HDAC2 and Tip60-induced enrichment in APP;Tip60 was more  
208 similar to  $w^{1118}$ .

209 We next performed enrichment quantification of the identified Tip60 and HDAC2 ChIP-  
210 Seq peaks in  $w^{1118}$  control, APP and APP;Tip60 larval heads to determine whether their  
211 chromatin binding was altered in APP larval heads (APP vs  $w^{1118}$ ) and whether increased Tip60  
212 could protect against potential binding changes (APP;Tip60 vs. APP). Our findings revealed that  
213 in the APP larval heads, there were robust changes in binding enrichment for both HDAC2 (5400  
214 peaks with increased binding and 6571 peaks with decreased binding) and Tip60 (1562 peaks  
215 with increased binding and 2023 peaks with decreased binding) (Fig. 4A and Supplemental  
216 Table 1: S4-3 & S4-1). Also, tissue enrichment of the top 2000 APP-induced peak enrichment  
217 unveils the HDAC2 and Tip60 neural specificity (Supplemental Fig. 3E & 3F). Increased Tip60  
218 levels induced a significant reduction in HDAC2 binding (2718 peaks with increased binding  
219 and 8960 peaks with decreased binding) and minimal changes in Tip60 binding (4 peaks with  
220 increased binding and 1 peak with decreased binding) (Fig. 4A and Supplemental Table 1: S4-4  
221 & S4-2). This Tip60 mediated trend in reduced HDAC2 binding is evident by the change in the  
222 ratio of decreased binding to increased binding (5.5:4.5 in APP vs  $w^{1118}$  to 7.7:2.3 in

223 APP;Tip60 vs. APP): an increase in the number of peaks with decreased binding (6571 in APP  
 224 vs  $w^{1118}$  to 8960 in APP;Tip60 vs. APP) decrease in the number of peaks with increased binding  
 225 (5400 in APP vs  $w^{1118}$  to 2718 in APP;Tip60 vs. APP), and a decrease in the median of  
 226  $\log_2$ FoldChange with increase in HDAC2 binding.

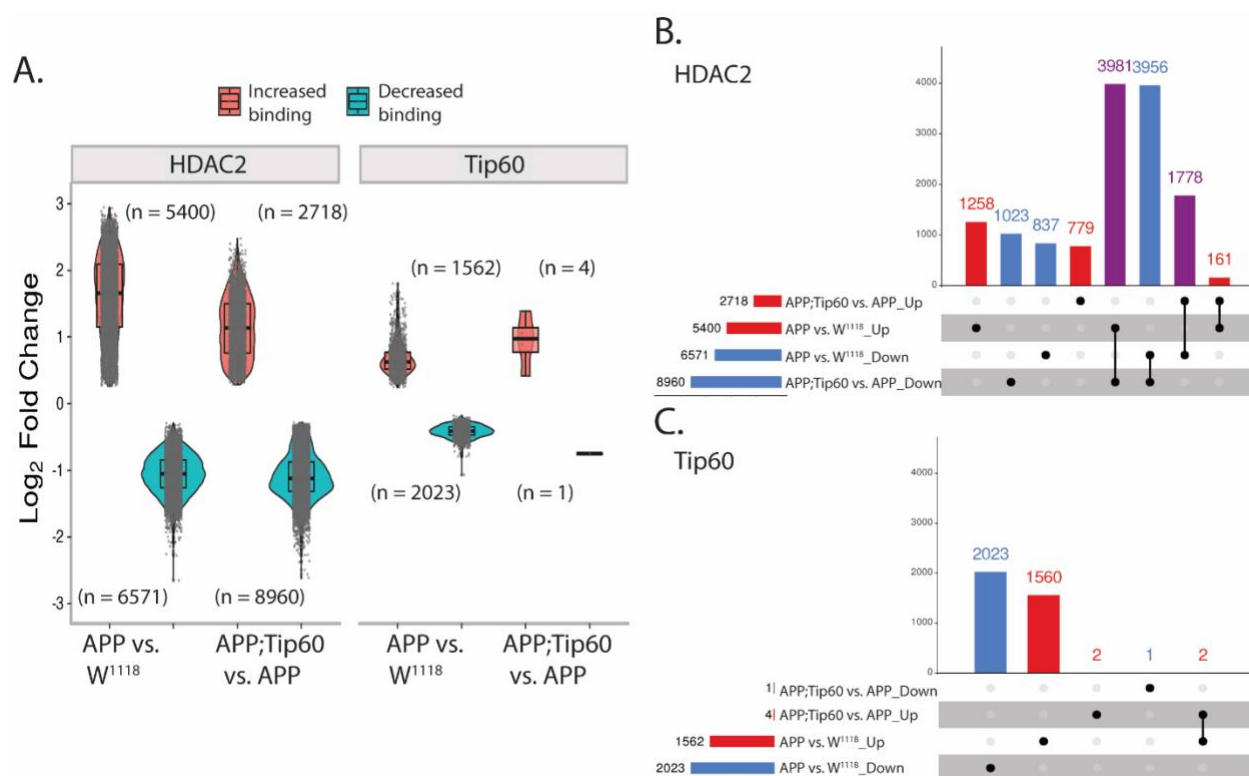

227

228 **Figure 4: Increased Tip60 protects against enhanced HDAC2 enrichment in APP larval**  
 229 **heads.** (A)  $\log_2$  fold changes of differentially bound peaks ( $p_{adj} \leq 0.05$ ) of HDAC2 and Tip60  
 230 in APP vs.  $w^{1118}$  and APP;Tip60 vs. APP. APP-induced changes (APP vs.  $w^{1118}$ ) were  
 231 prominent in both HDAC2 and Tip60 samples, while Tip60-induced changes (APP;Tip60 vs.  
 232 APP) were prominent only in HDAC2 samples. (B & C) The upSet plot represents the  
 233 distribution and intersection of differentially bound peaks between APP vs.  $w^{1118}$  and  
 234 APP;Tip60 vs. APP from HDAC2 (B) and Tip60 (C) samples. Rows represent the number of  
 235 peaks in each comparison (APP vs.  $w^{1118}$  and APP;Tip60 vs. APP), and columns represent the  
 236 number of peaks per interaction. The red and blue bars represent the increased and decreased  
 237 binding of HDAC2 or Tip60, respectively. The black filled dots indicate the association between  
 238 rows. The red and blue columns represent peaks unique to a given comparison, while the purple  
 239 columns represent the peaks rescued by Tip60 expression.

240 We next analyzed the distribution and intersection of altered peaks in larval heads between  
 241 genotypes APP vs.  $w^{1118}$  and APP;Tip60 vs. APP for HDAC2 (Fig. 4B) and Tip60 (Fig. 4C).

242 Remarkably, for HDAC2 binding, approximately 48% (5759/11971) of the total number of peaks  
243 altered in APP larval head (APP vs w<sup>1118</sup>) were restored by an increase in Tip60 levels  
244 (APP;Tip60 vs. APP). Thus, we refer to these peaks as "Tip60 reprogrammed HDAC2 peaks".  
245 The Tip60 reprogramming effect was primarily observed for HDAC2 binding, visualized with  
246 both profile plots (Fig. 5 E i & F i) and heatmaps (Fig. 5 E ii & F ii). As 60% of the identified  
247 Tip60 and HDAC2 peaks were enriched along the gene body, we visualized the ChIP-Seq read  
248 densities of the significantly altered peak enrichment + /- 0.5 kilobase from the center region of  
249 the gene body (Fig. 5 and Supplemental Fig. 4). In APP larval heads, (Fig. 5A-D), the increase in  
250 binding of HDAC2 (Fig. 5B) and decrease in binding of Tip60 (Fig. 5C) highly predominates  
251 over the decrease in binding of HDAC2 (Fig. 5A) and increase in binding of Tip60 (Fig. 5D).  
252 Further, increased Tip60 levels protected against alterations in the HDAC2 and Tip60 binding  
253 pattern in the APP larval heads (Supplemental Fig. 4A-D). Taken together, these results suggest  
254 that Tip60 exerts its neuroprotective action at least in part *via* protection against inappropriate  
255 repressor HDAC2 genome-wide enrichment along neuronal gene bodies.

256

257

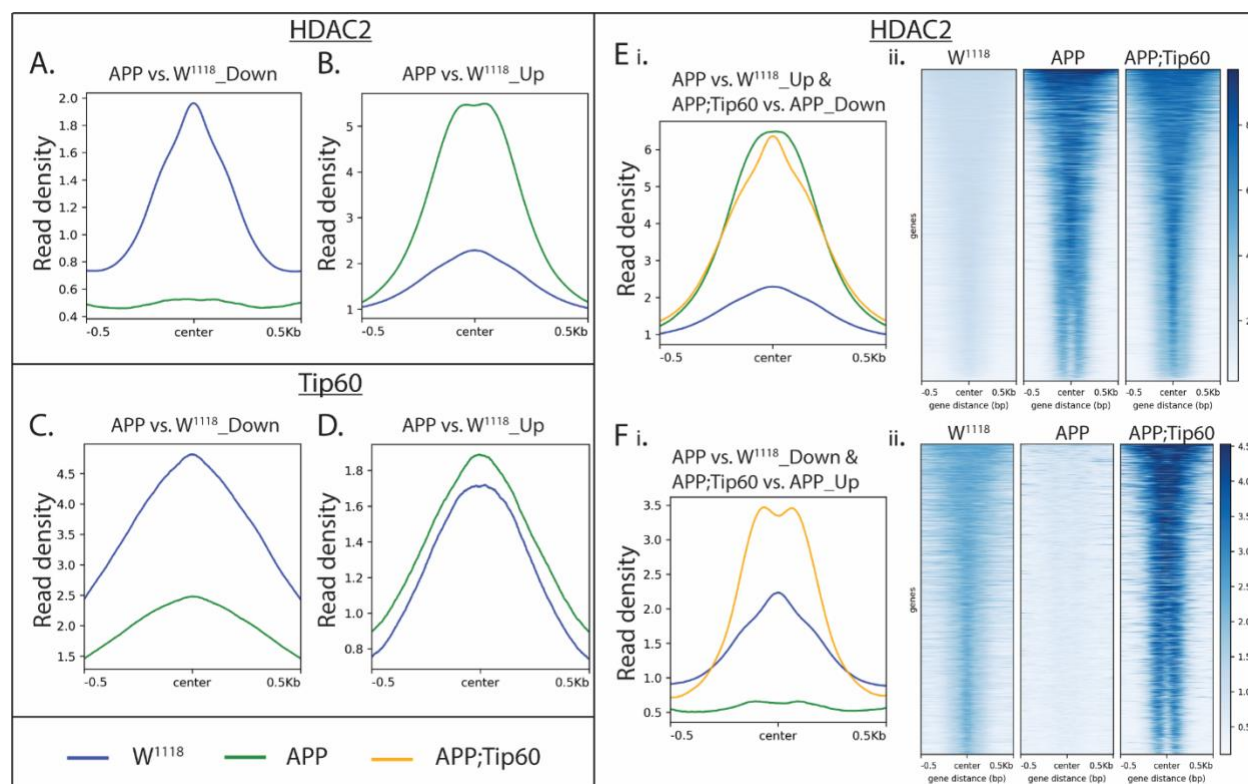

258

259 **Figure 5: Tip60 expression protected against alterations in the HDAC2 binding pattern**  
 260 **along the gene body in APP larval heads.** (A & B) Profile plots representing decreased (A) and  
 261 increased (B) binding of HDAC2 in APP larval heads. (C & D) Profile plots representing the  
 262 decreased (C) and increased (D) binding of Tip60 in APP larval heads. Profile plots also  
 263 represent the significant increase in HDAC2 binding (B) and decrease in Tip60 binding (C) in  
 264 APP larval heads. (E i. & F i.) Profile plots representing the rescue effect (reversal in APP-  
 265 induced binding pattern) of Tip60 expression on HDAC2 binding. (E ii. & F ii.) The  
 266 corresponding heatmaps represent the Tip60 rescue effect. Sequencing data centered + /- 0.5  
 267 kilobase from the center region of the gene body.

268 **Tip60/HDAC2 co-regulated genes functionally modulate AD neurodegeneration *in vivo* and**  
 269 **are conserved in the human AD brain.**

270 We observed that Tip60 and HDAC2 are recruited to genes in a binding enrichment pattern  
 271 that is disrupted during early AD neurodegeneration, predominantly by HDAC2 binding over  
 272 Tip60. To identify genes associated with Tip60 and HDAC2 that are misregulated under early  
 273 AD-associated APP conditions, we compared all differentially expressed genes from our RNA-  
 274 seq analysis (APP vs. w118 and APP vs. APP;Tip60) with the protein-encoding genes bound by  
 275 Tip60 in control w<sup>1118</sup> larval heads and the protein-encoding genes bound by HDAC2 binding in

276 APP larval heads (Supplemental Fig. 5A). Remarkably, this analysis revealed that 77% (or 3137  
277 genes) of the total number of genes identified were identical direct target genes for both HDAC2  
278 and Tip60. These results indicate that Tip60 and HDAC2 co-regulate an identical set of genes  
279 and that this control is altered during early AD conditions at least in part by enhanced HDAC2  
280 binding that may also displace Tip60 binding. Comparison of the top twenty (20) biological  
281 processes, enriched in gene ontology analysis, each for Tip60 and HDAC2 protein-encoding  
282 genes revealed that 17 of these biological processes are identical, further confirming that Tip60  
283 and HDAC2 co-regulate overlapping biological processes (Supplemental Fig. 5B & 5C). These  
284 processes included axon guidance, associative learning, and neuron differentiation, underscoring  
285 the importance of the co-regulatory function of Tip60 and HDAC2 in neural function and  
286 cognition.

287 We next asked whether these genes are functionally involved in modifying AD-associated  
288 neurodegeneration, *in vivo*. To address this question in an unbiased fashion, we selected 50 genes  
289 from the top 20 enriched biological processes that were present in both Tip60 and HDAC2 GO  
290 analysis (Supplemental Table 5). To assess whether these 50 genes could functionally modulate  
291 AD neurodegeneration *in vivo* we used the well-characterized *Drosophila* eye screen that  
292 enabled us to assess a gene ability to functionally modulate human tau-driven AD-associated  
293 neurodegeneration. To this end, the GMR-Gal4 driver was used to drive the expression of the  
294 mutant form of human tau V337M in all retinal cell types. Expression of h-tauV337M in the  
295 retina causes a moderately rough eye phenotype at 25°C, characterized by fused and disordered  
296 ommatidia with missing mechanosensory bristles (Blard et al., 2007). We determined whether  
297 RNAi-mediated knockdown of the genes of interest was able to modify this Tau-induced  
298 phenotype by comparing the rough eye phenotype of the Gal4-GMR Tau control flies to the  
299 surface of the control Gal4-GMR Tau crossed with RNAi flies. We found that out of 38 genes  
300 we were able to obtain RNAi fly lines for, 14 genes showed either enhancement or suppressing  
301 of the GMR Tau rough eye phenotype. The functions of these 14 genes include diverse roles in  
302 neuronal function and neurodegenerative disease and are referred to here as “Tip60/HDAC2 AD  
303 genes”: Shroom, oc, nwk, nmo, Syn, Appl, Dop1R1, RhoGAP100F, NetB, flw, trx, Thor, Dl, &  
304 CG7275. The results of the GMR Tau eye screen functionally triaged our mass data sets from  
305 both ChIP and RNA sequencing to further streamline mechanistic analysis underlying Tip60 and  
306 HDAC2 co-regulation of genes functionally involved in early AD-associated neurodegeneration.

307 We found that increased Tip60 protects against inappropriate genome-wide enhanced  
308 HDAC2 enrichment along the neuronal gene bodies during early AD linked neurodegeneration  
309 in APP larval heads. To expand these findings at high resolution, we mapped binding enrichment  
310 of both Tip60 and HDAC2 in APP, APP;Tip60, and  $w^{1118}$  larval heads along the 14  
311 Tip60/HDAC2 AD gene loci we had identified (Fig. 6 and Supplemental Fig. 6). These genes  
312 regulate roles in synaptic plasticity and neuronal developmental processes that include synaptic  
313 vesicle function (Syn & nwk), axonal outgrowth (NetB), neuronal signaling pathways (nmo, flw,  
314 Dop1R1, Dl, Appl, & RhoGAP100F), gene regulation (trx & Thor), actin filament formation and  
315 stabilization (Shroom), and neurodevelopment process (oc) (Larkin et al., 2020). Tip60 and  
316 HDAC2 not only both bind within each of these genes in all fly genotypes analyzed (APP,  
317 APP;Tip60,  $w^{1118}$ ) but remarkably, at almost identical genomic coordinates, suggesting that  
318 Tip60 and HDAC2 are co-recruited to the same docking sites within gene loci. Further, the same  
319 trend of inappropriate enhanced HDAC2 enrichment in APP vs.  $w^{1118}$  control that was protected  
320 against upon increased Tip60 levels (APP;Tip60 vs. APP) was observed at almost all of these  
321 genomic coordinates (Supplemental Table 6). Taken together our results support a model by  
322 which Tip60 and HDAC2 co-regulate neuronal target genes *via* recruitment to overlapping  
323 binding sites within gene bodies.

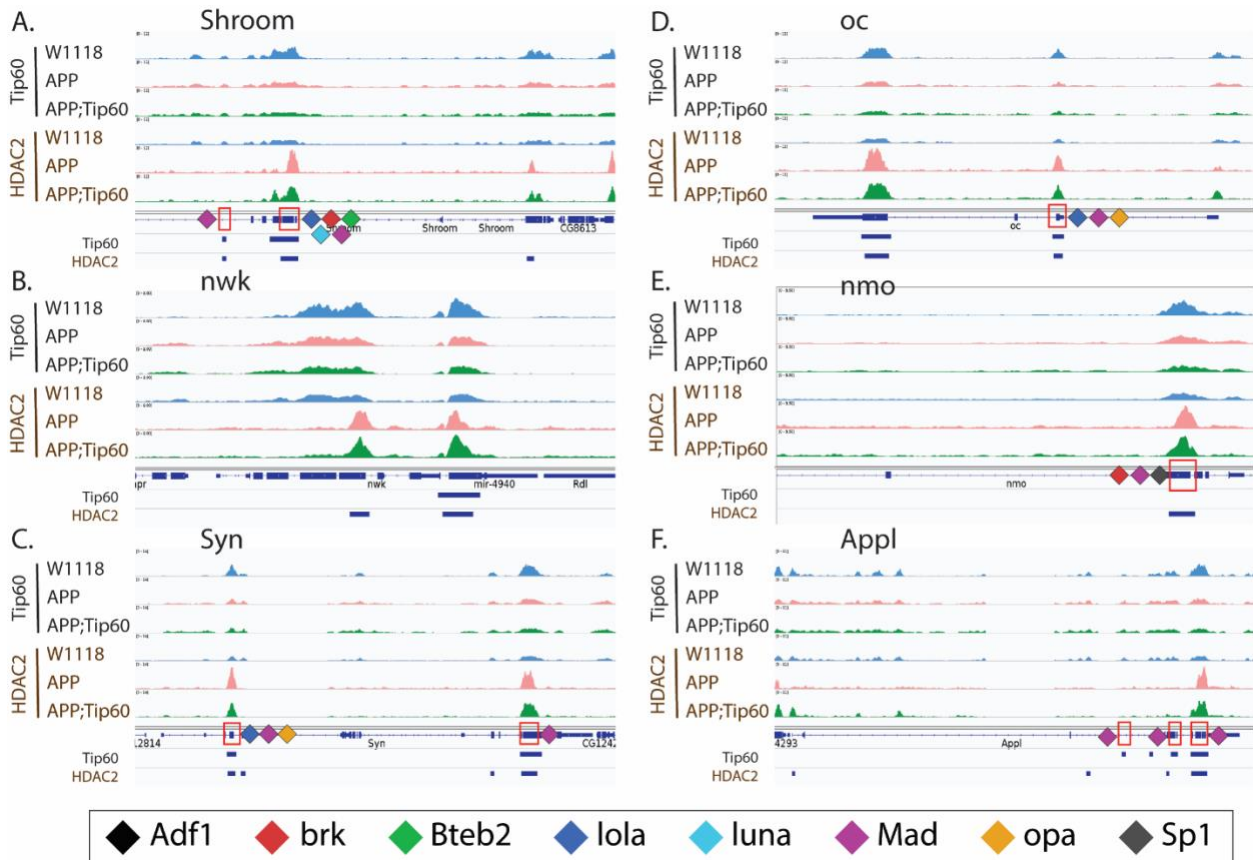

**Figure 6: Tip60 and HDAC2 bind at similar genomic coordinates and co-regulate synaptic plasticity and neuronal developmental process-related genes.** (A-F) Genome browser track view of Tip60 and HDAC2 peaks in three genotypes (w1118, APP, and APP;Tip60) at the Shroom (A), nwk (B), Syn (C), oc (D), nmo (E), and Appl (F) loci. Below the tracks, the gene features panel has loci marked: representing the transcription factor (Adf1, brk, Bteb2, lola, luna, Mad, opa, and Sp1) binding sites. The blue bars below the gene features panel depicts the regions bound by Tip60 and HDAC2. These genes with significantly enriched peaks exhibit a prominent phenotypical difference in eye screen.

Tip60 and HDAC2 both can interact with transcription factors (TFs) that aid in their gene recruitment and regulatory functions (Aghdassi et al., 2012; Frank et al., 2003; Hlubek et al., 2001; Tea, Chihara, & Luo, 2010; Yang, Inouye, Zeng, Bearss, & Seto, 1996) that we speculate are disrupted in early AD stages. Thus, we asked whether there are conserved TF motif binding sites within genes altered for both expression and Tip60 and HDAC2 binding during early AD stages. To address this question, genes selected for this analysis were triaged by comparing ChIP-Seq and RNA-Seq data sets for AD-associated alterations (APP vs. w<sup>1118</sup>) to select for down-regulated genes with reduced Tip60 and enhanced HDAC2 binding and up-regulated



341 genes with enhanced Tip60 and reduced HDAC2 binding. Only those gene alterations that were  
342 protected against by increased Tip60 levels were selected for motif analysis. The selected genes  
343 were termed as up-regulated rescue (UpRegRes) list and a down-regulated rescue  
344 (DownRegRes) list (Supplemental Fig. 7). GO analysis of these genes revealed that the top  
345 biological processes were enriched for functions in learning & memory, axon guidance &  
346 extension, neurogenesis & neuron development, and gene silencing & chromatin modification  
347 (Supplemental Table 7), further underscoring the importance of Tip60 and HDAC2 in neuronal  
348 functions disrupted in AD. Motif enrichment analysis was performed to identify the TFs  
349 controlling the rescue genes' transcription. With HDAC2 encompassing the rescue list, Tip60  
350 bound coordinates altered by APP expression were also included for motif discovery  
351 (Supplemental Table 8). The analysis revealed eight TFs with neuronal functions and gene  
352 control (Fig. 7A) and motif regions within the Tip60/HDAC2 AD genes (Fig. 7B). Remarkably,  
353 many of these TFs are located either within or close to the identified Tip60 and HDAC2 co-  
354 peaks (Fig. 6 and Supplemental Fig. 6). Notably, 9 of the 14 Tip60/HDAC2 AD genes have Mad  
355 binding sites. Our results suggest that recruitment of Tip60 and HDAC2 by common TFs within  
356 gene bodies may be a general mechanism by which these chromatin regulators co-regulate  
357 neuronal gene expression.

A.

| Consensus | Motif ID<br>(Transcription factor) | Genes with<br>Motif                                             | Transcription factor function                              |
|-----------|------------------------------------|-----------------------------------------------------------------|------------------------------------------------------------|
|           | Adf1                               | Dop1R1<br>RhoGAP100F                                            | Dendrite growth;<br>Synapse formation                      |
|           | brk                                | nmo<br>RhoGAP100F<br>Shroom                                     | Transcriptional repression                                 |
|           | Bteb2                              | Shroom                                                          | prevents neuronal apoptosis                                |
|           | lola                               | oc<br>Shroom<br>Syn                                             | Axon growth and guidance;<br>Glutamate receptor expression |
|           | luna                               | Shroom                                                          | Developmental process<br>(preblastoderm embryo)            |
|           | Mad                                | App1; DI<br>Dop1R1; nmo<br>RhoGAP100F<br>Shroom; oc<br>Syn; trx | Synaptic growth                                            |
|           | opa                                | oc<br>Syn                                                       | eye-antennal disc<br>morphogenesis                         |
|           | Sp1                                | nmo<br>RhoGAP100F                                               | Imaginal disc development                                  |

B.

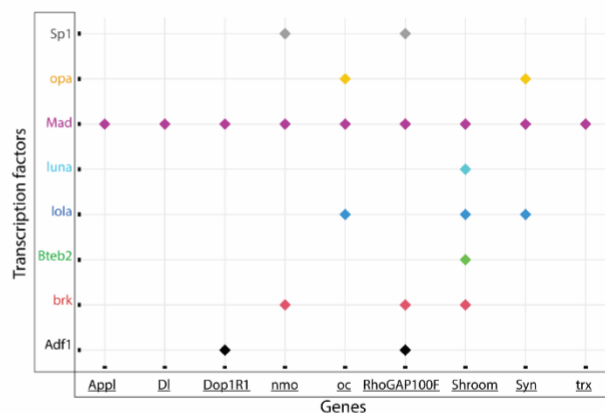

358

359 **Figure 7: Transcription factor (TF) motifs significantly enriched within the rescue gene list**  
 360 **and the associated Tip60/HDAC2 AD genes.** TF motifs were identified using the MEME-Chip  
 361 platform (CentriMo). (A) Consensus sequences and their corresponding TFs bound and the  
 362 associated Tip60/HDAC2 AD genes. (B) Plot representing the association of Tip60/HDAC2 AD  
 363 genes and the TFs.

364 Finally, we asked whether the Tip60/HDAC2 binding alterations and gene dysregulation  
 365 we observed in APP larval heads were also reflected at the protein level. To address this, we  
 366 used mass spectrometry (MS) analysis of proteins isolated from the larval brains of  $w^{1118}$ , APP,  
 367 and APP;Tip60 genotypes to identify significantly differentially regulated proteins [abs(FC) >  
 368 1.5 & q-value <= 0.1] with APP (APP vs.  $w^{1118}$ ) and Tip60 (APP;Tip60 vs. APP) expression  
 369 (Supplemental Table 9). Analysis of the ~1100 most enriched proteins, identified by MS,  
 370 revealed that 74 of these proteins were altered in their levels in the APP larval brain and 67 of  
 371 these in Tip60 expressed brains (Supplemental Fig. 8). Gene ontology analysis revealed that  
 372 these proteins regulate methylation [histone (Art1 & Art4) & mRNA (Art4)], axon guidance &  
 373 transport (Dys), nucleocytoplasmic shuttling (Ntf-2), and glutamate (Galphas) & cholinergic  
 374 (Dys) pathways (Supplemental Table 10). Comparison of proteomics and next-generation

375 sequencing (RNA-seq & ChIP-seq) data reveal that 23% (17/74) of these altered proteins are  
376 directly encoded by Tip60/HDAC2 co-regulated genes misregulated in the APP larval brain and  
377 11% (7/67) in the Tip60 expressed brains. (Fig. 8 and Supplemental Table 11). These results  
378 suggest that early AD-associated alterations in epigenetic gene regulation persist to the protein  
379 level.

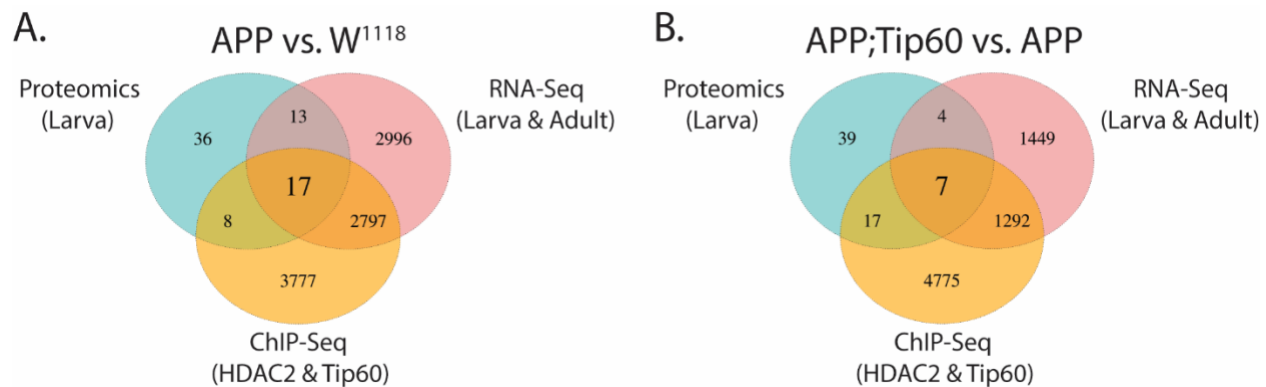

380

381 **Figure 8: RNA-seq, ChIP-seq, and mass spectrometry data convey the integrative and**  
382 **independent gene expression regulation induced by APP and Tip60 expression.** (A & B)  
383 Venn diagram of differentially regulated genes in the third instar larval and adult heads (RNA-  
384 seq), genes with differentially binding of Tip60 and HDAC2 in the third instar larval heads  
385 (ChIP-seq), and differentially regulated proteins in the third instar larval heads (mass  
386 spectrometry) from (A) APP vs. w1118 comparison and (B) APP;Tip60 vs. APP comparison.

387 **Tip60/HDAC2 co-regulation of neuronal genes is disrupted in hippocampus of AD patients.**

388 Neuronal gene co-regulation by antagonizing epigenetic enzymes in the human brain has  
389 not been investigated previously. A subset of Tip60 and HDAC2 co-regulated direct target genes  
390 we identified from our *Drosophila* ChIP-Seq and RNA-Seq analysis that also modify Tau  
391 pathology have human orthologs. To confirm human AD disease relevance, we asked whether  
392 these same human orthologs are also co-targets of Tip60 and HDAC2 in the human hippocampus  
393 and are epigenetically misregulated in the hippocampus from AD patients as we observed in the  
394 AD-associated APP fly model. To address these questions, we performed ChIP analysis using  
395 chromatin prepared from age-matched human healthy control and AD hippocampus. We  
396 quantified enrichment of Tip60 and HDAC2 within gene bodies using real-time PCR.  
397 Remarkably, all 14 genes tested were found to be direct gene targets for both Tip60 and HDAC2  
398 in the human hippocampus (Fig. 9). Further, ChIP analysis using chromatin from AD patients

399 revealed that Tip60 enrichment was significantly decreased at 12 of the 14 genes (Fig. 9A).  
 400 Further, HDAC enrichment was also altered with an increase at 7 of the 14 genes tested and a  
 401 decrease at 5 of the 14 genes tested (Fig. 9B). Remarkably, five of these genes (Fchsd2, otx1,  
 402 syde1, ppp1cb, shroom2, dcaf13, and nlk) showed opposite trends in Tip60/HDAC2 binding in  
 403 the human AD hippocampus, similar to what we observed in AD larval heads. Our findings  
 404 reveal that Tip60/HDAC2 co-regulatory mechanisms underlying neuronal gene expression that  
 405 are disrupted during early AD stages in the fly brain and protected against by increased Tip60 are  
 406 conserved in the hippocampus of human AD patients.

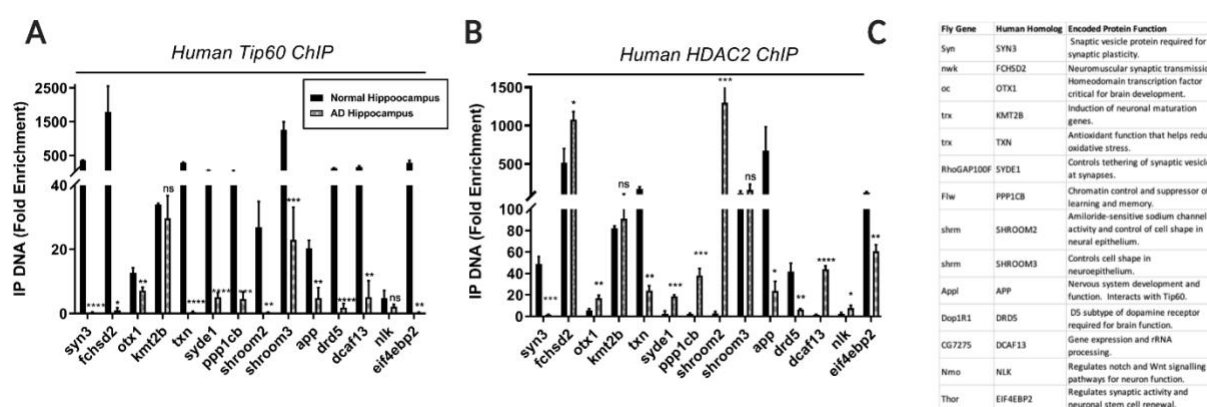

407  
 408 **Figure 9. Human homologs of co-Tip60/HDAC2 Drosophila neural gene targets exhibit**  
 409 **conserved Tip60 and HDAC2 binding patterns in normal versus AD patient hippocampi.**  
 410 Chromatin was isolated from healthy control and AD hippocampus (n=3 brains per condition).  
 411 Histograms represent ChIP enrichment using antibodies to (A) Tip60 and (B) and HDAC2. All  
 412 data are from three independent experiments. Statistical significance was calculated using  
 413 unpaired Student's t test. \*p < 0.05, \*\*p < 0.01, \*\*\*p < 0.001, \*\*\*\*p < 0.0001. Error bars  
 414 indicate SEM. (See Figure X-1 for primer sequences) (C) Table depicting Drosophila and human  
 415 homolog gene names and conserved gene functions.

## 416 DISCUSSION

417 Here we report the first genome-wide HAT versus HDAC profiling study assessing  
 418 epigenetic alterations initiated during early stages of AD-associated neurodegeneration modeled  
 419 in the *Drosophila* APP larval brain. A key finding from our analysis revealed that both Tip60  
 420 and HDAC2 binding is not exclusively restricted to promoter regions but also enriched  
 421 predominantly along the gene bodies, suggesting these enzymes may act to both initiate and then  
 422 maintain gene regulatory control in a poised state (Greer et al., 2015; L. Wang et al., 2017; Z.

423 Wang et al., 2009). Additionally, since gene-body bound TFs also regulate RNA splicing by  
424 binding to pre-mRNAs to recruit HATs that increase histone acetylation to facilitate RNA  
425 Polymerase elongation and exon exclusion or HDACs that reduce histone acetylation to slow  
426 RNA Polymerase elongation and exon inclusion, Tip60 and HDAC2 might also function to  
427 regulate RNA splicing of target genes (Greer et al., 2015; Rambout, Dequiedt, & Maquat, 2018).  
428 Further, we observed robust alterations in binding enrichment for both HDAC2 and Tip60 in the  
429 AD larval brain well before amyloid plaque accumulation and lethality, indicating that chromatin  
430 remodeling changes are an initial event in neurodegenerative progression and not a consequence.  
431 Notably, our analysis showed a predominant increase in binding of HDAC2 (Fig. 5B) and a  
432 decrease in binding of Tip60 (Fig. 5C) within central gene bodies of their target loci. These  
433 findings expand prior studies showing enhanced HDAC2 recruitment to a focused subset of  
434 synaptic genes in AD fly (Panikker et al., 2018) and mouse models (Graff et al., 2012) by  
435 revealing for the first time that an increase in HDAC2 binding is a broad genome-wide AD-  
436 associated phenomenon that occurs significantly within gene bodies resulting in their  
437 dysregulation. A similar complimentary trend in a marked reduction in genome-wide H4K16  
438 acetylation in the human AD brain (Nativio, Donahue, Berson, Lan, Amlie-Wolf, Tuzer, Toledo,  
439 Gosai, Gregory, Torres, et al., 2018), which notably is the preferential acetylation target for  
440 Tip60, has recently been reported. Thus, our results indicate that some histone acetylation  
441 changes (X. Lu, Wang, Yu, Yu, & Yu, 2015; Nativio, Donahue, Berson, Lan, Amlie-Wolf,  
442 Tuzer, Toledo, Gosai, Gregory, Torres, et al., 2018; Stilling & Fischer, 2011) functionally  
443 contributing to AD may be initiated at the level of altered Tip60 and HDAC2 antagonistic  
444 enzyme recruitment within the central gene body regions.

445 Another significant finding originating from our work is that Tip60 and HDAC2 co-  
446 regulate a similar set of genes that function in cognition linked neural processes disrupted early  
447 in AD progression. Comparison of enriched HDAC2 gene targets in the APP larval heads with  
448 Tip60 gene targets in the *w<sup>1118</sup>* larval heads revealed that, remarkably, 77% of these genes are  
449 identical and misregulated in the AD fly brain (Supplemental Fig. 5A). Further, gene ontology  
450 analysis of Tip60 versus HDAC2 target genes revealed that 17 of the top 20 most enriched  
451 biological processes identified for each enzyme also overlapped and included functions like  
452 axonal guidance, associative learning, and neuron differentiation: underscoring their importance  
453 in cognitive function and relevance to AD (Supplemental Fig. 5B & 5C). Thus, while other

454 groups have proposed that HAT and HDAC enzymatic activities may both be present in close  
455 proximity to each other on gene regulatory regions (Peserico & Simone, 2011; Yamagoe et al.,  
456 2003) we are the first to report co-docking of Tip60/HDAC2 on chromatin targets that mediates  
457 a co-regulatory function for neural genes at a genome-wide level. Finally, we find that almost  
458 one-fourth of the proteins altered in the APP larval brain (17/74) are encoded by dysregulated  
459 Tip60/HDAC2 co-target genes (Fig. 8A), indicating that such early AD-associated  
460 Tip60/HDAC2 epigenetic alterations persists at the RNA and the protein level.

461 How might Tip60 and HDAC2 be co-recruited to similar genomic loci within neural  
462 genes? It is well-documented that both HATs and HDACs interact with the same TF that  
463 facilitates their recruitment to gene loci to promote chromatin remodeling and transcriptional  
464 control. For instance, NF- $\kappa$ B interacts with and is acetylated by p300/CBP and deacetylated by  
465 HDAC1/HDAC2 to increase and decrease target gene expression, respectively (Chen & Greene,  
466 2004). However, whether HATs and HDACs can bind simultaneously to the same gene by being  
467 recruited by either different TFs in close proximity within a given gene locus or by the same TF  
468 remains to-be elucidated. Here, in our motif Enrichment Analysis of Tip60 and HDAC2 ChIP-  
469 Seq peaks, we identify eight TFs with known neuronal functions and gene control (Fig. 7) that  
470 are located either within or in proximity to the Tip60 and HDAC2 co-peaks we identified within  
471 AD-associated neural gene loci (Fig. 6 and Supplemental Fig. 6). These findings indicate that  
472 these TFs are involved in the co-recruitment of Tip60 and HDAC2 to common gene regulatory  
473 regions. Most notably, Mad binds to 9 of the 14 AD-associated genes we analyzed and,  
474 remarkably, is present at the identical coordinates within co-Tip60 and HDAC2 peaks within  
475 *Appl* ( $\beta$  amyloid protein precursor-like), *shroom*, *oc*, *synapsin* and *delta* genes (Fig. 6, Supp. Fig.  
476 6). Accordingly, in prior studies, Mad has been shown to interact with both Tip60 and HDAC2  
477 in other systems to activate and repress gene expression, respectively (Frank et al., 2003; Laherty  
478 et al., 1997). Our results support a model by which Mad, along with other TFs within a given  
479 gene body, serve as docking sites for recruitment of both HDAC2 and Tip60 either separately  
480 and within proximity to one another or simultaneously, thus keeping genes poised for rapid  
481 activation or repression. We speculate that these scenarios are not mutually exclusive of one  
482 another and, importantly, may explain the rapid histone acetylation changes within activity-  
483 dependent neural genes that drive their swiftly fluctuating transcriptional responses (Karnay &  
484 Elefant, 2017; Katan-Khaykovich & Struhl, 2002; Peserico & Simone, 2011). Intriguingly, some

485 of the TFs we identify have been previously implicated in AD. For example, Sp1 dysregulation  
 486 identified in the AD frontal cortex has been proposed to alter its regulation of APP and Tau  
 487 target genes (Citron, Dennis, Zeitlin, & Echeverria, 2008), while human SMAD (human ortholog  
 488 of fly Mad) activity is also reduced in the AD brain, causing dysregulation of downstream  
 489 signaling pathway mediated gene expression (Ueberham et al., 2014).

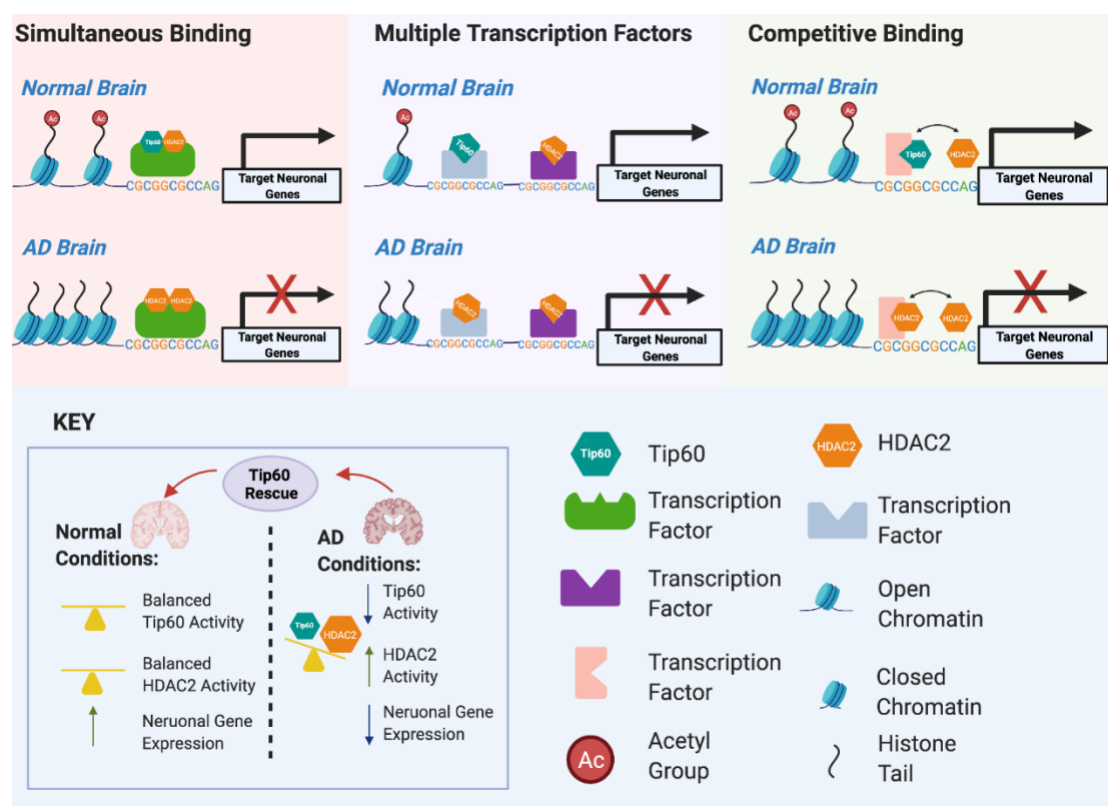

490

491 **Figure 10. Model for Tip60 and HDAC2 co-mediated neuronal gene control.** Our results  
 492 support a model by which transcription factors (TFs) within a given neuronal gene body serve as  
 493 docking sites for recruitment of both HDAC2 and Tip60 either simultaneously to the same TF,  
 494 separately to multiple TFs within close proximity to one another or competitively to a given TF.  
 495 We speculate that these scenarios are not mutually exclusive of one another and may explain the  
 496 rapid histone acetylation changes within activity-dependent neural genes that drive their swiftly  
 497 fluctuating transcriptional responses. Early disruption of Tip60/HDAC homeostasis in AD  
 498 causes enhanced HDAC2 recruitment with concomitant gene disruption. Increasing Tip60  
 499 protects against altered HAT/HDAC homeostasis in the brain to maintain appropriate neuronal  
 500 gene expression profiles and neural health.

501 In the present study, a pivotal discovery with clinical relevance is that increased Tip60  
 502 levels protect against altered HDAC2 binding and restoration of appropriate gene expression in

503 the larval brains. Essentially, such Tip60 mediated neuroprotection against epigenetic gene  
504 dysregulation is a genome-wide phenomenon as evidenced by our observation that 5400 genes  
505 display inappropriate enhanced HDAC2 binding and that increased Tip60 protects against such  
506 increases for 74% (3981/5400) of these affected genes in the AD larval brain (Figure 4B).  
507 Interestingly, we observed such inappropriate enhanced HDAC2 binding significantly in the  
508 gene body's central region (Figure 5). Further, high-resolution mapping of Tip60 and HDAC2  
509 peaks within AD-associated neuronal genes reveal that enhanced HDAC2 and reduced Tip60  
510 binding in the APP larval head occurs within several Tip60/HDAC2 co-docking sites, with such  
511 inappropriate enhanced HDAC2 enrichment reduced with increased Tip60 levels (Fig. 6,  
512 Supplemental Fig. 6, and Fig. 5E). Similar trends in altered Tip60/HDAC2 co-regulation of  
513 human orthologs of these genes were observed in the human AD hippocampus (Fig. 9),  
514 highlighting human relevance and the remarkable conservation in Tip60/HDAC2 epigenetic  
515 mechanisms between AD flies and human patients. Together, our findings support a model that  
516 increased HDAC2 in the AD larval and human brain (Graff et al., 2012) displaces genome-wide  
517 Tip60 recruitment within gene bodies that may be initiated at co-Tip60/HDAC2 docking sites,  
518 causing harmful changes in gene expression that persist and worsen during disease progression.  
519 Tip60 may mediate its neuroprotective role in epigenetic gene control by either reducing  
520 HDAC2 levels, a phenomenon which we previously demonstrated to occur at the transcriptional  
521 level (Panikker et al., 2018) and/or by displacing inappropriate enhanced HDAC2 binding levels  
522 to restore Tip60 mediated gene regulation.

523 Our study proposes a mechanism involving aberrant Tip60 and HDAC2 co-recruitment to  
524 genes genome-wide to explain how histone acetylation changes are initiated in AD, providing  
525 informative directions for chromatin-mediated therapeutic avenues. For example, HDAC  
526 inhibitors (HDACi) lack target specificity and act to increase global acetylation (Fischer,  
527 Sananbenesi, Mungenast, & Tsai, 2010; Haberland, Montgomery, & Olson, 2009; Johnson et al.,  
528 2013), reducing their applicability as safe cognition promoting therapeutics, thus promoting  
529 exploration into more specific HAT activators that can potentially reset AD associated site  
530 specific histone acetylation disruption. Our findings underscore this concept by showing that  
531 HDAC2 has reduced gene target specificity compared with Tip60, as evidenced by the far more  
532 HDAC2 genome-wide target genes altered in the APP larval brain (Fig. 4A) when compared to  
533 Tip60. Nevertheless, increased Tip60 specifically protects against altered HDAC2 binding at



534 most genes in the APP larval heads (Fig. 4B) and at many of the co-Tip60/HDAC2 docking sites  
535 with TF binding motifs (Fig. 6, Supplemental Fig. 6, and Fig. 7), highlighting the relevance for  
536 Tip60 and/or Tip60/HDAC2 interacting TFs as more specific therapeutic targets. Further, these  
537 Tip60/HDAC2 binding alterations, at specific gene loci, before A $\beta$  accumulation is detectable,  
538 support these sites as potentially valuable early AD biomarker "hot spots" that are easy to track.  
539 Recently, we reported that disruption of Tip60 and HDAC2 balance in the brain is a common  
540 event in other neurodegenerative diseases modeled in *Drosophila*: HD, ALS, and PD (Beaver et  
541 al., 2020). Further studies may reveal a therapeutic potential for targeting Tip60 in these  
542 disorders as well. Together, our findings warrant future epigenetic therapeutic studies intended to  
543 restore Tip60 mediated histone acetylation homeostasis for earlier and more selective treatment  
544 for AD and potentially other neurodegenerative disorders.

## 545 **MATERIALS AND METHODS**

### 546 *Fly stocks*

547 Fly strains and crosses. All fly lines were raised under standard conditions at 22°C on  
548 standard yeasted *Drosophila* media (Applied Scientific Jazz Mix *Drosophila* Food; Thermo  
549 Fisher Scientific, MA, USA). The pan-neuronal driver *elav* C155 and the transgenic UAS lines  
550 carrying human APP 695 isoform (UAS-APP) were obtained from Bloomington *Drosophila*  
551 Stock. Generation and characterization of double-transgenic UAS APP;Tip60 WT fly lines are  
552 described in Pirooznia et al. (2012). The w<sup>1118</sup> line served as the genetic background control. All  
553 experimental crosses were performed at normal physiological temperature of 25°C with 12 hour  
554 light/dark cycles.

### 555 *Immunofluorescence, imaging, and quantification*

556 For anti-A $\beta$ 42 immunofluorescence samples were prepared as described in Zhang et al.,  
557 (2020). Briefly, larval or adult brains were dissected in PBS, fixed in fixation buffer containing  
558 0.7% paraformaldehyde and 0.9% lysine for 1 h at room temperature, washed three times in PBS  
559 containing 0.5% Triton X-100 (PBST) for 15 min each time at room temperature, and blocked  
560 for 1 h at room temperature in PBST containing 5% normal goat serum, and incubated with  
561 primary anti-A $\beta$ 42 (1:100, #05-831-I, Millipore, MA, USA) antibody in blocking solution  
562 overnight at 4°C. Samples were washed three times in PBST for 15 min each time at room

563 temperature and incubated with goat anti-mouse Alexa Fluor 488 (1:300, #A28175, Invitrogen,  
564 CA, USA) and propidium iodide (PI, a final concentration of 1.5  $\mu$ M) for 2 h at room  
565 temperature. After washing three times in PBST for 15 min each time, samples were mounted in  
566 VECTASHIELD antifade mounting media (Vector Laboratories, CA, USA).

567 For imaging, samples were analyzed as described in Zhang et al., (2020). Confocal  
568 microscopy was performed using a ZEISS microscope (LSM 700, ZEISS, NY, USA). The optical  
569 intervals were 5.94  $\mu$ m z-sections for 100 $\times$  magnifications and 0.79  $\mu$ m z-sections for 200 $\times$   
570 magnifications. The optical intervals were determined by the optimized pinhole diameters which  
571 are 33.3  $\mu$ m at 1 Airy Unit (AU) for 100 $\times$  magnification and 25.1  $\mu$ m at 1 AU for 200 $\times$   
572 magnification. Consecutive z-stacks through the entire Kn were used for quantification.  
573 Consecutive subsets of the z-stacks approximately at the level of center Kn were used for the  
574 final projection and display. The quantification of A $\beta$  plaques and apoptosis in different  
575 genotypes was measured under 200 $\times$  magnification using Image J software.

#### 576 *RNA isolation*

577 Total RNA was isolated from third-instar larval brains or seven-day-old adult heads using  
578 the QIAGEN RNeasy Mini Kit (#74106, QIAGEN, MD, USA) following the manufacturer's  
579 protocol. The quality, quantity, and purity of RNA were determined using a Nanodrop  
580 spectrophotometer (Thermo Fisher Scientific, MA, USA) and 2100 Bioanalyzer (Agilent  
581 Technologies, CA, USA). RNA samples with an RNA integrity number (RIN)  $\geq$  8.0 were used  
582 for sequencing.

#### 583 *RNA-Seq library preparation, sequencing, and analysis*

584 100 ng of total RNA was used to prepare libraries using TruSeq Stranded Total RNA kit  
585 (Illumina, CA, USA) according to the manufacturer's instructions. The final libraries at the  
586 concentration of 4 nM were sequenced on NextSeq 500 platform (Illumina, CA, USA) using 75  
587 bp paired-end sequencing. Raw FASTQ sequencing reads were aligned to the *Drosophila*  
588 *melanogaster* genome (Ensembl version BDGP6) using RNA-Seq by Expectation-Maximization  
589 (RSEM) (B. Li & Dewey, 2011). Total read counts were obtained using RSEM's calculate-  
590 expression function. Principal component analysis (PCA) and heatmap clustering (Euclidean

591 distance) were performed to cluster the samples and identify the batch effects and sample  
592 heterogeneity. All the plots were constructed using R/Bioconductor.

### 593 *Differential gene expression analysis*

594 Differential gene expression between any two genotypes was tested using the DESeq2: a  
595 statistical tool that employs shrinkage estimates to compute fold changes (Love, Huber, &  
596 Anders, 2014). Raw RNA-Seq read counts from biological replicates of each genotype were used  
597 as the input for DESeq2. For both larval and adult data, all three genotypes ( $w^{1118}$ , APP, and  
598 APP;Tip60) were analyzed together using a single model matrix, and the desired pairwise  
599 comparisons were then extracted. Only genes that displayed log<sub>2</sub>FoldChange of  $\leq -0.583$  and  $\geq$   
600  $0.583$  in their expression levels, with an adjusted p-value  $\leq 0.05$ , were used for the UpSet plot  
601 (Conway, Lex, & Gehlenborg, 2017) and gene ontology (GO) analysis (FlyEnrichr) (Kuleshov et  
602 al., 2016). Among the ontologies in GO analysis, GO Biological Process GeneRIF was included  
603 in our downstream analysis. Heatmaps were generated using the ComplexHeatmap package (Gu,  
604 Eils, & Schlesner, 2016). The TissueEnrich package is used to calculate enrichment of tissue-  
605 specific genes in a set of input genes (Jain & Tuteja, 2019).

### 606 *Chromatin immunoprecipitation (ChIP)*

607 Chromatin was extracted and sheared from ~200 third-instar larval heads per replicate. To  
608 obtain larval heads, the first 1/3 of the larvae (anterior head region) was isolated. Remaining fat  
609 bodies were carefully dissected and discarded. All larval heads were inspected visually to ensure  
610 that the entire CNS was intact. Using the GAL4-inducible system to target gene expression  
611 exclusively in the nervous system of the larvae ensures virtually no variability in gene expression  
612 in the samples used. For IPs, we used truChIP Chromatin Shearing Kit (Covaris Inc., MA, USA)  
613 following the manufacturer's instructions. Briefly, protein–DNA cross-links were made at RT for  
614 5 min with 1% formaldehyde and tissue was pulverized using the CryoPrep (Covaris Inc., MA,  
615 USA). Cells were lysed and nuclei were prepared using Covaris lysis buffer. Sonication of DNA  
616 was performed using a Covaris E220 Ultrasonicator for 15 min. The sheared chromatin was  
617 immunoprecipitated using the EZ-Magna ChIP A Chromatin Immunoprecipitation Kit  
618 (Millipore, MA, USA) following the manufacturer's instructions. Sheering quality and chromatin  
619 quantity was determined using Agilent Bioanalyzer DNA 1000 kit (Agilent Technologies, CA,

620 USA). Briefly, ChIP was performed with 30  $\mu$ g of sheared chromatin using anti-Rpd3 (ab1767,  
621 Abcam, MA, USA), anti-Tip60 (ab23886, Abcam, MA, USA). The eluted material from the  
622 immunoprecipitation along with an input sample was then purified using a QIAquick PCR  
623 purification kit (QIAGEN, MD, USA).

#### 624 *ChIP-Seq library preparation, sequencing, and analysis*

625 ChIP-Seq libraries were prepared from the ChIP-enriched DNA samples using the Accel-  
626 NGS 2SPlus DNA Library Kit (Swift Biosciences, MI, USA), following the 350 base pair insert  
627 guide of the protocol. After library preparation, all libraries were normalized and sequenced  
628 using the standard Illumina loading protocol on the Illumina NextSeq 500 Sequencer (Illumina,  
629 CA, USA). Sequence read fragments were aligned to the *Drosophila melanogaster* BDGP6  
630 genome using the BWA-MEM aligner (H. J. a. p. a. Li, 2013). Samtools was used to filter the  
631 resulting alignments to remove reads with mapping quality below q30 and any remaining  
632 duplicate reads, and then to merge replicate BAM files for each factor and condition (H. Li et al.,  
633 2009). Peak calling was performed on the reads that passed filters for each replicate in addition  
634 to the merged alignments using macs2 with default settings (Zhang et al., 2008). The resulting  
635 peaks were annotated for genomic features using the HOMER annotatePeaks.pl tool (Heinz et  
636 al., 2010). Replicate peak calls were used to estimate the irreproducibility discovery rate (IDR)  
637 and create consensus peak sets with  $IDR \leq 0.05$  (Q. Li, Brown, Huang, & Bickel, 2011). Regions  
638 of interest were defined by intersecting the consensus peak sets with Ensembl BDGP6.22  
639 annotation release 98. The featureCounts tool from the subread software package was used to  
640 generate read counts for each region of interest (Liao, Smyth, & Shi, 2014). PCA and heatmap  
641 clustering (Euclidean distance) were performed to cluster the samples and identify the batch  
642 effects and sample heterogeneity. All the plots were constructed using R/Bioconductor.

#### 643 *Differential binding analysis*

644 Differential binding of peaks (region of interests) between any two genotypes was tested  
645 using the DESeq2 (Love et al., 2014). Raw read counts, for each region of interest, from  
646 biological replicates of each genotype were used as the input for DESeq2. For Tip60 and  
647 HDAC2 samples, all three genotypes (w<sup>1118</sup>, APP, and APP;Tip60) were analyzed together using  
648 a single model matrix, and the desired pairwise comparisons were then extracted. Peaks with an

649 adjusted p-value  $\leq 0.05$  were used for the UpSet plot analysis (Conway et al., 2017). Genes  
650 associated with these peaks were further for GO analysis (FlyEnrichr) (Kuleshov et al., 2016).  
651 Among the ontologies in GO analysis, GO Biological Process GeneRIF was included in our  
652 downstream analysis.

### 653 *Visualization of ChIP-seq data*

654 The merged BAM files for each genotype were converted to BPM normalized BigWig files  
655 using bamCompare. computeMatrix was used to calculate scores per genome regions  
656 (Differentially bound regions from DESeq2) and prepared an intermediate file that can be used  
657 with plotHeatmap and plotProfiles (Ramírez et al., 2016). The reference point for the plotting  
658 was the center of the region with a window of + /- 0.5 kilobase. For ChIP-Seq track generation,  
659 BigWig files were used with Integrated Genomics Viewer (IGV\_Linux\_2.8.6) (Robinson et al.,  
660 2011). The BED files used for IGV contain genomic coordinates of the significantly enriched  
661 peaks of genes resulted from the eye-screen (Supplemental Table 6).

### 662 *Motif enrichment analysis*

663 We performed DNA motif enrichment analysis, central motif enrichment analysis or  
664 CentriMo (Bailey & Machanick, 2012), to detect the positional enrichment of previously  
665 characterized TF binding motifs in the Tip60 and HDAC2 bound sequences (Supplemental Fig.  
666 7). The Combined Drosophila Databases (TF motifs) provided in the web version of the  
667 CentriMo were used as the input for CentriMo. The default options were used for the analysis,  
668 and the statistical significance of discovered motifs was estimated using *P* values and *E*-values  
669 derived from a one-tailed binomial test (Supplemental Table 8).

### 670 *Protein isolation, identification, and analysis*

671 Protein was extracted from dissected third-instar larval brains of three genotypes (w<sup>1118</sup>,  
672 APP, and APP;Tip60) and was sent to Bioproximity LLC for proteomic profiling. Samples were  
673 subjected to enzymatic digestion with sequencing-grade trypsin. The digested peptides were  
674 cleaned-up by solid-phase extraction (SPE) protocol. Each digestion mixture was analyzed by  
675 UPLC-MS/MS (Ultra performance liquid chromatography-tandem mass spectrometer). LC was  
676 performed on an Easy-nLC 1200 system (Thermo Fisher Scientific, MA, USA) fitted with a

677 heated, 25 cm Easy-Spray column. The LC was interfaced to a quadrupole-Orbitrap mass  
678 spectrometer (Q-Exactive HF-X, Thermo Fisher Scientific, MA, USA). TMGF (Mascot Generic  
679 Format) files were searched using X!Tandem and Open Mass Spectrometry Search Algorithm  
680 (OMSSA). Protein intensity values were calculated using OpenMS to measure the area under the  
681 curve of identified peptides. The Perseus software platform was used for protein quantification,  
682 cross-comparisons between genotypes, and multiple-hypothesis testing (Benjamini-Hochberg  
683 FDR: t-test p-value adjusted to account for multiple testing) (Tyanova et al., 2016). Proteins with  
684  $q < 0.05$  and  $|FC| > 1.5$ , determined as significantly changed proteins, were used for downstream  
685 analysis. Protein-protein interaction networks among the significantly changed proteins were  
686 visualized using STRING on the Cytoscape platform (Cytoscape\_v3.7.2) (Shannon et al., 2003).  
687 Functional enrichment analysis was performed using FlyEnrichr (Kuleshov et al., 2016) and GO  
688 Biological Process GeneRIF was included in our downstream analysis.

#### 689 *ChIPqPCR (Human)*

690 For all human studies, human hippocampal samples were obtained from National Disease  
691 Research Interchange, with informed consent by all donors. Control brains included three males  
692 with an age range of 70–85 years. AD brains were from one male and two females with an age  
693 range of 73–87 years.

694 Chromatin was extracted and sheared from ~120 mg human hippocampus using truChIP  
695 Chromatin Shearing Kit (Covaris Inc., MA, USA) following the manufacturer's instructions.  
696 Briefly, protein–DNA crosslinks were made at RT for 5 min with 1% formaldehyde and tissue  
697 was pulverized using the CryoPrep (Covaris Inc., MA, USA). Cells were lysed and nuclei were  
698 prepared using Covaris lysis buffer. Sonication of DNA was performed using a Covaris E220  
699 Ultrasonicator for 13 min. The sheared chromatin was immunoprecipitated using the EZ-Magna  
700 ChIPA Chromatin Immunoprecipitation Kit (Millipore, MA, USA) following the manufacturer's  
701 instructions. Briefly, ChIP was performed with 50ug of sheared chromatin using anti-Tip60  
702 (ab23886, Abcam, MA, USA), anti-HDAC2 (ab12169, Abcam, MA, USA), and Normal Mouse  
703 IgG Polyclonal Antibody control (Millipore, MA, USA). Eluted material from the  
704 immunoprecipitation was purified using a QIAquick PCR purification kit (QIAGEN, MD, USA)  
705 and used directly for real-time PCR.

706 qRT-PCRs were performed in a 20  $\mu$ L reaction volume containing cDNA, 1 M Power SYBR  
707 Green PCR Master Mix (Applied Biosystems, CA, USA), and 10 M forward and reverse primers  
708 (Supplemental Table 12). Primer sets were designed by NCBI/Primer-BLAST  
709 ([www.ncbi.nlm.nih.gov/tools/primer-blast/](http://www.ncbi.nlm.nih.gov/tools/primer-blast/)). RT-qPCR was performed using an ABI 7500 Real-  
710 Time PCR system (Applied Biosystems, CA, USA) following the manufacturer's instructions.  
711 Fold enrichment for all the respective genes was calculated relative to the non-specific Mouse  
712 IgG Polyclonal Antibody control.

### 713 *Statistical analysis*

714 Statistical analysis of RNA-Seq, ChIP-Seq, and mass spectrometry (MS) data differences  
715 between two groups were considered statistically significant with  $q < 0.05$  (FDR  $< 0.05$ ,  
716 controlled by Benjamini–Hochberg). For ChIP-seq analysis, sample sizes were  $w^{1118} = 3$ ;  
717 APP = 2; APP;Tip60 = 2. For RNA-seq analysis, the sample size for third-instar larva was  $w^{1118}$   
718 = 2; APP = 2; APP;Tip60 = 2 and for seven-day-old adult flies was  $w^{1118} = 3$ ; APP = 3;  
719 APP;Tip60 = 3. For MS analysis, sample sizes were  $w^{1118} = 3$ ; APP = 2; APP;Tip60 = 2.

720 Model figure created using BioRender.com

### 721 **ACKNOWLEDGEMENTS**

722 Research reported in this publication utilized the MetaOmics Shared Resource at Sidney Kimmel Cancer  
723 Center at Jefferson Health that was supported by the National Cancer Institute of the National Institutes of  
724 Health (NIH) under Award Number P30CA056036. We thank Adam Ertel and Guarav Kumar for their  
725 help with the initial bioinformatics analysis. We are grateful for the human subjects and their families for  
726 participation in this study. The research was supported by the National Institutes of Neurological  
727 Disorders and Stroke of the NIH under Award Number R01HD057939 to F.E.

### 728 **COMPETING INTERESTS**

729 There are no competing interests declared for all authors.

730

### 731 **References**

732

733 Aghdassi, A., Sendler, M., Guenther, A., Mayerle, J., Behn, C.-O., Heidecke, C.-D., . . . Lerch, M. M. (2012).  
734 Recruitment of histone deacetylases HDAC1 and HDAC2 by the transcriptional repressor ZEB1  
735 downregulates E-cadherin expression in pancreatic cancer. *Gut*, 61(3), 439-448.

- 736 Bailey, T. L., & Machanick, P. J. N. a. r. (2012). Inferring direct DNA binding from ChIP-seq. *40*(17), e128-  
737 e128.
- 738 Beaver, M., Bhatnagar, A., Panikker, P., Zhang, H., Snook, R., Parmar, V., . . . Elefant, F. (2020). Disruption  
739 of Tip60 HAT mediated neural histone acetylation homeostasis is an early common event in  
740 neurodegenerative diseases. *Sci Rep*, *10*(1), 18265. doi:10.1038/s41598-020-75035-3
- 741 Berson, A., Nativio, R., Berger, S. L., & Bonini, N. M. (2018). Epigenetic regulation in neurodegenerative  
742 diseases. *Trends in neurosciences*, *41*(9), 587-598.
- 743 Blard, O., Feuillette, S., Bou, J., Chaumette, B., Frébourg, T., Champion, D., & Lecourtois, M. (2007).  
744 Cytoskeleton proteins are modulators of mutant tau-induced neurodegeneration in *Drosophila*.  
745 *Hum Mol Genet*, *16*(5), 555-566. doi:10.1093/hmg/ddm011
- 746 Chen, L.-F., & Greene, W. C. (2004). Shaping the nuclear action of NF- $\kappa$ B. *Nature Reviews Molecular Cell*  
747 *Biology*, *5*(5), 392-401. doi:10.1038/nrm1368
- 748 Citron, B. A., Dennis, J. S., Zeitlin, R. S., & Echeverria, V. (2008). Transcription factor Sp1 dysregulation in  
749 Alzheimer's disease. *Journal of Neuroscience Research*, *86*(11), 2499-2504.  
750 doi:<https://doi.org/10.1002/jnr.21695>
- 751 Conway, J. R., Lex, A., & Gehlenborg, N. J. B. (2017). UpSetR: an R package for the visualization of  
752 intersecting sets and their properties. *33*(18), 2938-2940.
- 753 Fischer, A., Sananbenesi, F., Mungenast, A., & Tsai, L. H. (2010). Targeting the correct HDAC(s) to treat  
754 cognitive disorders. *Trends Pharmacol Sci*, *31*(12), 605-617. doi:10.1016/j.tips.2010.09.003
- 755 Fossgreen, A., Bruckner, B., Czech, C., Masters, C. L., Beyreuther, K., & Paro, R. (1998). Transgenic  
756 *Drosophila* expressing human amyloid precursor protein show gamma-secretase activity and a  
757 blistered-wing phenotype. *Proceedings National Academy of Sciences*, *96*, 13703-13708.
- 758 Fossgreen, A., Brückner, B., Czech, C., Masters, C. L., Beyreuther, K., & Paro, R. (1998). Transgenic  
759 *Drosophila* expressing human amyloid precursor protein show gamma-secretase activity and a  
760 blistered-wing phenotype. *Proc Natl Acad Sci U S A*, *95*(23), 13703-13708.  
761 doi:10.1073/pnas.95.23.13703
- 762 Frank, S. R., Parisi, T., Taubert, S., Fernandez, P., Fuchs, M., Chan, H.-M., . . . Amati, B. (2003). MYC  
763 recruits the TIP60 histone acetyltransferase complex to chromatin. *EMBO reports*, *4*(6), 575-580.  
764 doi:10.1038/sj.embor.embor861
- 765 Graff, J., Rei, D., Guan, J. S., Wang, W. Y., Seo, J., Hennig, K. M., . . . Tsai, L. H. (2012). An epigenetic  
766 blockade of cognitive functions in the neurodegenerating brain. *Nature*, *483*(7388), 222-226.  
767 doi:10.1038/nature10849
- 768 Greer, C. B., Tanaka, Y., Kim, Y. J., Xie, P., Zhang, M. Q., Park, I.-H., & Kim, T. H. (2015). Histone  
769 deacetylases positively regulate transcription through the elongation machinery. *Cell reports*,  
770 *13*(7), 1444-1455.
- 771 Greeve, I., Kretschmar, D., Tschape, J.A., Beyn, A., Brellinger, C., Schweizer, M., Nitsch, T.M.,  
772 Reifegerste, R. (2004). Age-dependent neurodegeneration and Alzheimer-amyloid plaque  
773 formation in transgenic *Drosophila*. *Journal of Neuroscience*(16), 3899-38906.
- 774 Grothe, M. J., Sepulcre, J., Gonzalez-Escamilla, G., Jelistratova, I., Scholl, M., Hansson, O., . . . Alzheimer's  
775 Disease Neuroimaging, I. (2018). Molecular properties underlying regional vulnerability to  
776 Alzheimer's disease pathology. *Brain*, *141*(9), 2755-2771. doi:10.1093/brain/awy189
- 777 Gu, Z., Eils, R., & Schlesner, M. J. B. (2016). Complex heatmaps reveal patterns and correlations in  
778 multidimensional genomic data. *32*(18), 2847-2849.
- 779 Haberland, M., Montgomery, R. L., & Olson, E. N. (2009). The many roles of histone deacetylases in  
780 development and physiology: implications for disease and therapy. *Nat Rev Genet*, *10*(1), 32-42.  
781 doi:10.1038/nrg2485



- 782 Heinz, S., Benner, C., Spann, N., Bertolino, E., Lin, Y. C., Laslo, P., . . . Glass, C. K. J. M. c. (2010). Simple  
783 combinations of lineage-determining transcription factors prime cis-regulatory elements  
784 required for macrophage and B cell identities. *38*(4), 576-589.
- 785 Hlubek, F., Löhberg, C., Meiler, J., Jung, A., Kirchner, T., & Brabletz, T. (2001). Tip60 is a cell-type-specific  
786 transcriptional regulator. *The Journal of Biochemistry*, *129*(4), 635-641.
- 787 Iijima, K., Chiang, H. C., Hearn, S. A., Hakker, I., Gatt, A., Shenton, C., . . . Zhong, Y. (2008). Abeta42  
788 mutants with different aggregation profiles induce distinct pathologies in *Drosophila*. *PLoS One*,  
789 *3*(2), e1703. doi:10.1371/journal.pone.0001703
- 790 Iijima, K., Liu, H. P., Chiang, A. S., Hearn, S. A., Konsolaki, M., & Zhong, Y. (2004). Dissecting the  
791 pathological effects of human Abeta40 and Abeta42 in *Drosophila*: a potential model for  
792 Alzheimer's disease. *Proc Natl Acad Sci U S A*, *101*(17), 6623-6628.  
793 doi:10.1073/pnas.0400895101
- 794 Jain, A., & Tuteja, G. J. B. (2019). TissueEnrich: Tissue-specific gene enrichment analysis. *35*(11), 1966-  
795 1967.
- 796 Johnson, A. A., Sarthi, J., Pirooznia, S. K., Reube, W., & Elefant, F. (2013). Increasing Tip60 HAT levels  
797 rescues axonal transport defects and associated behavioral phenotypes in a *Drosophila*  
798 Alzheimer's disease model. *J Neurosci*, *33*(17), 7535-7547. doi:10.1523/JNEUROSCI.3739-  
799 12.2013
- 800 Karch, C. M., Cruchaga, C., & Goate, A. M. (2014). Alzheimer's disease genetics: from the bench to the  
801 clinic. *Neuron*, *83*(1), 11-26. doi:10.1016/j.neuron.2014.05.041
- 802 Karnay, A. M., & Elefant, F. (2017). Chapter 14 - *Drosophila* Epigenetics. In T. O. Tollefsbol (Ed.),  
803 *Handbook of Epigenetics (Second Edition)* (pp. 205-229): Academic Press.
- 804 Katan-Khaykovich, Y., & Struhl, K. (2002). Dynamics of global histone acetylation and deacetylation in  
805 vivo: rapid restoration of normal histone acetylation status upon removal of activators and  
806 repressors. *Genes & development*, *16*(6), 743-752. doi:10.1101/gad.967302
- 807 Kuleshov, M. V., Jones, M. R., Rouillard, A. D., Fernandez, N. F., Duan, Q., Wang, Z., . . . Lachmann, A. J.  
808 N. a. r. (2016). Enrichr: a comprehensive gene set enrichment analysis web server 2016 update.  
809 *44*(W1), W90-W97.
- 810 Kunkle, B. W., Grenier-Boley, B., Sims, R., Bis, J. C., Damotte, V., Naj, A. C., . . . Environmental Risk for  
811 Alzheimer's Disease, C. (2019). Genetic meta-analysis of diagnosed Alzheimer's disease identifies  
812 new risk loci and implicates Abeta, tau, immunity and lipid processing. *Nat Genet*, *51*(3), 414-  
813 430. doi:10.1038/s41588-019-0358-2
- 814 Laherty, C. D., Yang, W.-M., Sun, J.-M., Davie, J. R., Seto, E., & Eisenman, R. N. (1997). Histone  
815 Deacetylases Associated with the mSin3 Corepressor Mediate Mad Transcriptional Repression.  
816 *Cell*, *89*(3), 349-356. doi:10.1016/S0092-8674(00)80215-9
- 817 Larkin, A., Marygold, S. J., Antonazzo, G., Attrill, H., dos Santos, G., Garapati, P. V., . . . Consortium, F.  
818 (2020). FlyBase: updates to the *Drosophila melanogaster* knowledge base. *Nucleic acids*  
819 *research*, *49*(D1), D899-D907. doi:10.1093/nar/gkaa1026
- 820 Li, B., & Dewey, C. N. J. B. b. (2011). RSEM: accurate transcript quantification from RNA-Seq data with or  
821 without a reference genome. *12*(1), 1-16.
- 822 Li, H., Handsaker, B., Wysoker, A., Fennell, T., Ruan, J., Homer, N., . . . Durbin, R. J. B. (2009). The  
823 sequence alignment/map format and SAMtools. *25*(16), 2078-2079.
- 824 Li, H. J. a. p. a. (2013). Aligning sequence reads, clone sequences and assembly contigs with BWA-MEM.
- 825 Li, Q., Brown, J. B., Huang, H., & Bickel, P. J. J. T. a. o. a. s. (2011). Measuring reproducibility of high-  
826 throughput experiments. *5*(3), 1752-1779.
- 827 Liao, Y., Smyth, G. K., & Shi, W. J. B. (2014). featureCounts: an efficient general purpose program for  
828 assigning sequence reads to genomic features. *30*(7), 923-930.

- 829 Love, M. I., Huber, W., & Anders, S. J. G. b. (2014). Moderated estimation of fold change and dispersion  
830 for RNA-seq data with DESeq2. *15*(12), 1-21.
- 831 Lu, X., Wang, L., Yu, C., Yu, D., & Yu, G. (2015). Histone Acetylation Modifiers in the Pathogenesis of  
832 Alzheimer's Disease. *Frontiers in cellular neuroscience*, *9*, 226-226.  
833 doi:10.3389/fncel.2015.00226
- 834 Lu, X., Wang, L., Yu, C., Yu, D., and Yu, G. (2015). Histone acetylation modifiers in the pathogenesis of  
835 Alzheimer's disease. *Frontiers in Cellular Neuroscience*, *9*(226), 1-8.
- 836 Masters, C. L., Bateman, R., Blennow, K., Rowe, C. C., Sperling, R. A., & Cummings, J. L. (2015).  
837 Alzheimer's disease. *Nat Rev Dis Primers*, *1*, 15056. doi:10.1038/nrdp.2015.56
- 838 Nativio, R., Donahue, G., Berson, A., Lan, Y., Amlie-Wolf, A., Tuzer, F., . . . Torres, C. (2018). Dysregulation  
839 of the epigenetic landscape of normal aging in Alzheimer's disease. *Nature neuroscience*, *21*(4),  
840 497.
- 841 Nativio, R., Donahue, G., Berson, A., Lan, Y., Amlie-Wolf, A., Tuzer, F., . . . Berger, S. L. (2018).  
842 Dysregulation of the epigenetic landscape of normal aging in Alzheimer's disease. *Nature*  
843 *neuroscience*, *21*(4), 497-505. doi:10.1038/s41593-018-0101-9
- 844 Panikker, P., Xu, S. J., Zhang, H., Sarthi, J., Beaver, M., Sheth, A., . . . Elefant, F. (2018). Restoring Tip60  
845 HAT/HDAC2 Balance in the Neurodegenerative Brain Relieves Epigenetic Transcriptional  
846 Repression and Reinstates Cognition. *J Neurosci*, *38*(19), 4569-4583.  
847 doi:10.1523/JNEUROSCI.2840-17.2018
- 848 Patel, H., Dobson, R. J. B., & Newhouse, S. J. (2019). A Meta-Analysis of Alzheimer's Disease Brain  
849 Transcriptomic Data. *J Alzheimers Dis*, *68*(4), 1635-1656. doi:10.3233/JAD-181085
- 850 Peserico, A., & Simone, C. (2011). Physical and Functional HAT/HDAC Interplay Regulates Protein  
851 Acetylation Balance. *Journal of Biomedicine and Biotechnology*, *2011*, 371832.  
852 doi:10.1155/2011/371832
- 853 Pirooznia, S. K., Sarthi, J., Johnson, A. A., Toth, M. S., Chiu, K., Koduri, S., & Elefant, F. (2012). Tip60 HAT  
854 activity mediates APP induced lethality and apoptotic cell death in the CNS of a Drosophila  
855 Alzheimer's disease model. *PLoS One*, *7*(7), e41776. doi:10.1371/journal.pone.0041776
- 856 Rambout, X., Dequiedt, F., & Maquat, L. (2018). Beyond Transcription: Roles of Transcription Factors in  
857 Pre-mRNA Splicing. *Chemical reviews*, *118* 8, 4339-4364.
- 858 Ramírez, F., Ryan, D. P., Grüning, B., Bhardwaj, V., Kilpert, F., Richter, A. S., . . . Manke, T. J. N. a. r.  
859 (2016). deepTools2: a next generation web server for deep-sequencing data analysis. *44*(W1),  
860 W160-W165.
- 861 Robinson, J. T., Thorvaldsdóttir, H., Winckler, W., Guttman, M., Lander, E. S., Getz, G., & Mesirov, J. P. J.  
862 N. b. (2011). Integrative genomics viewer. *29*(1), 24-26.
- 863 Saha, R. N., & Pahan, K. (2006). HATs and HDACs in neurodegeneration: a tale of disconcerted  
864 acetylation homeostasis. *Cell Death Differ*, *13*(4), 539-550. doi:10.1038/sj.cdd.4401769
- 865 Sanchez-Mut, J. V., & Graff, J. (2015). Epigenetic Alterations in Alzheimer's Disease. *Front Behav*  
866 *Neurosci*, *9*, 347. doi:10.3389/fnbeh.2015.00347
- 867 Shannon, P., Markiel, A., Ozier, O., Baliga, N. S., Wang, J. T., Ramage, D., . . . Ideker, T. J. G. r. (2003).  
868 Cytoscape: a software environment for integrated models of biomolecular interaction networks.  
869 *13*(11), 2498-2504.
- 870 Stilling, R. M., & Fischer, A. (2011). The role of histone acetylation in age-associated memory impairment  
871 and Alzheimer's disease. *Neurobiology of learning and memory*, *96*(1), 19-26.  
872 doi:<https://doi.org/10.1016/j.nlm.2011.04.002>
- 873 Tea, J. S., Chihara, T., & Luo, L. (2010). Histone deacetylase Rpd3 regulates olfactory projection neuron  
874 dendrite targeting via the transcription factor Prospero. *Journal of Neuroscience*, *30*(29), 9939-  
875 9946.

- 876 Tyanova, S., Temu, T., Sinitcyn, P., Carlson, A., Hein, M. Y., Geiger, T., . . . Cox, J. J. N. m. (2016). The  
877 Perseus computational platform for comprehensive analysis of (prote) omics data. *13*(9), 731.
- 878 Ueberham, U., Rohn, S., Ueberham, E., Wodischeck, S., Hilbrich, I., Holzer, M., . . . Arendt, T. (2014). Pin1  
879 promotes degradation of Smad proteins and their interaction with phosphorylated tau in  
880 Alzheimer's disease. *Neuropathol Appl Neurobiol*, *40*(7), 815-832. doi:10.1111/nan.12163
- 881 Wang, L., Zhang, F., Rode, S., Chin, K. K., Ko, E. E., Kim, J., . . . Qiao, H. (2017). Ethylene induces  
882 combinatorial effects of histone H3 acetylation in gene expression in Arabidopsis. *BMC*  
883 *genomics*, *18*(1), 1-13.
- 884 Wang, Z., Zang, C., Cui, K., Schones, D. E., Barski, A., Peng, W., & Zhao, K. (2009). Genome-wide Mapping  
885 of HATs and HDACs Reveals Distinct Functions in Active and Inactive Genes. *Cell*, *138*(5), 1019-  
886 1031. doi:10.1016/j.cell.2009.06.049
- 887 Xu, S., Wilf, R., Menon, T., Panikker, P., Sarthi, J., & Elefant, F. (2014). Epigenetic control of learning and  
888 memory in *Drosophila* by Tip60 HAT action. *Genetics*, *198*(4), 1571-1586.  
889 doi:10.1534/genetics.114.171660
- 890 Yamagoe, S., Kanno, T., Kanno, Y., Sasaki, S., Siegel, R. M., Lenardo, M. J., . . . Ozato, K. (2003).  
891 Interaction of Histone Acetylases and Deacetylases In Vivo. *Molecular and cellular biology*, *23*(3),  
892 1025-1033. doi:10.1128/mcb.23.3.1025-1033.2003
- 893 Yang, W. M., Inouye, C., Zeng, Y., Bearss, D., & Seto, E. (1996). Transcriptional repression by YY1 is  
894 mediated by interaction with a mammalian homolog of the yeast global regulator RPD3. *Proc*  
895 *Natl Acad Sci U S A*, *93*(23), 12845-12850. doi:10.1073/pnas.93.23.12845
- 896 Zhang, Y., Liu, T., Meyer, C. A., Eeckhoute, J., Johnson, D. S., Bernstein, B. E., . . . Li, W. J. G. b. (2008).  
897 Model-based analysis of CHIP-Seq (MACS). *9*(9), 1-9.

898
